# Supplementary material
Source: PubMed Central journal article supplement (PMC4411637)

**Supplementary Data**

**Supplementary Figure 1.** Knocking down all AR variants (AR-Vs) and full-length AR in 22Rv1 cells.

(A). Schematic representation of full-length AR mRNA and protein of AR-Vs in 22Rv1 cells. The siRNA and shRNA target sites are also indicated. 22Rv1 cells have a duplicated exon 3 which codes for a third zinc finger in the DNA-binding domain.

(B). 22Rv1 cells were transfected with non-targeting siRNA (siNT) or siRNA targeting AR Exon1 or AR Exon 7 for 72 hr. Lysates were subjected to Western immunoblotting using a polyclonal antibody targeted to the AR N-terminal domain and tubulin antibody.

(C). 22Rv1 cells were transfected with empty vector (shCon) or shRNA targeting AR Exon 1 or AR Exon 8 for 72 hr. Lysates were subjected to Western immunoblotting using a polyclonal antibody targeted to the AR N-terminal domain and actin antibody.

**Supplementary Figure 2.** Real-time RT-PCR validation of microarray results in 22Rv1 cells. 22Rv1 cells were transfected with empty vector control (shCon) or shRNA targeting AR Exon 1 (shEx 1) for 72 hr in androgen-depleted conditions with medium supplemented with 10% CSS. RNA was isolated and subjected to quantitative real-time RT-PCR using primers specific for some top genes identified from the microarray gene expression experiment in 22Rv1 cells. Expression is relative to empty vector control, which was arbitrarily set to 1. Data are expressed as means ( $\pm$  SEM) from three independent biological replicates.

(A). Genes identified to be down-regulated in microarray after knocking down all AR isoforms.

(B). Genes identified to be up-regulated in microarray after knocking down all AR isoforms.

**Supplementary Table 1.** Primers used for real-time RT-PCR and CHIP-qPCR

**Supplementary Table 2.** Probe sets for which expression is induced and repressed by AR variants independent of full-length AR.

**Supplementary Table 3.** Probe sets are differentially expressed between localized prostate cancer and castration-resistant prostate cancer specimens.

**Supplementary Table 4.** Probe sets are differentially expressed between benign and malignant prostate specimens.

**Supplementary Table 5.** Expression patterns of probes in common or unique in GP3, GP4, GP5 and LN metastatic specimens.

**Supplementary Table 6.** Probe sets for which expression correlates with prostate cancer disease progression.

**Supplementary Table 7.** Follow-up data on patients with localized disease.

**Supplementary Table 8.** Probe sets for which expression correlates with biochemical failure.

ACCEPTED MANUSCRIPT

| <b>Gene</b>      | <b>Primers for RT-PCR and ChIP-qPCR</b> |                             |
|------------------|-----------------------------------------|-----------------------------|
| PMEPA1           | Forward 5'                              | TGC AAC TGC AAA CGC TCT TT  |
|                  | Reverse 5'                              | CCA CCA CCA TCA CCA TCA TC  |
| MKNK2            | Forward 5'                              | TCC TGA GCC ACA TCC ACA AG  |
|                  | Reverse 5'                              | GTG GGC GAT GCC TTT GTT AT  |
| PALLD            | Forward 5'                              | AAG ATG CTG GTG CGT GAG AA  |
|                  | Reverse 5'                              | CAC AAG CTC CAG GCT GAA TG  |
| SIGMAR1          | Forward 5'                              | ACC ATC ATC TCT GGC ACC TT  |
|                  | Reverse 5'                              | CTC CAC CAT CCA TGT GTT TG  |
| NRP-1            | Forward 5'                              | CAC CAA GGT GAC CAC TGG AA  |
|                  | Reverse 5'                              | CAG CAA TCC CAC CAA GGT TT  |
| SGK              | Forward 5'                              | AGG AGG ATG GGT CTG AAC GA  |
|                  | Reverse 5'                              | AGG AGA AGG GTT GGC ATT CA  |
| PLA2G10 (X-PLA2) | Forward 5'                              | TAC CTG TGT GCC TGC CAA TC  |
|                  | Reverse 5'                              | ACC CAC AGT TCC TGC CAG TT  |
| NR4A2 (NURR1)    | Forward 5'                              | GAC TCC AAC CCG GCT ATG AC  |
|                  | Reverse 5'                              | TGG AGC CAG TCA GGA GAT CA  |
| ACPP (PAcP)      | Forward 5'                              | CTT GCC ACT TGA CGG AAT TG  |
|                  | Reverse 5'                              | CTG CAG CCA GGT AGC ATG AG  |
| BNIP3L (NIX)     | Forward 5'                              | CAC ACC AGC AGG GAC CAT AG  |
|                  | Reverse 5'                              | GTG GAA CTC CTT GGG TGG AA  |
| LEF1             | Forward 5'                              | ACG TGA AGC CTC AGC ATG AA  |
|                  | Reverse 5'                              | AGC AAC GAC ATT CGC TCT CA  |
| KLK3 enhancer    | Forward 5'                              | TGA GAA ACC TGA GAT TAG GA  |
|                  | Reverse 5'                              | ATC TCT CTC AGA TCC AGG CT  |
| PMEPA1 enhancer  | Forward 5'                              | AAA CAG AAG GTG GGA GAC AAA |
|                  | Reverse 5'                              | TAC CCT GGC TAA AGC AGT TTC |



|           |          |          |          |          |          |          |          |          |          |           |          |          |           |                   |          |          |          |              |    |                                                                              |                                                                              |                                                                                |                                                           |
|-----------|----------|----------|----------|----------|----------|----------|----------|----------|----------|-----------|----------|----------|-----------|-------------------|----------|----------|----------|--------------|----|------------------------------------------------------------------------------|------------------------------------------------------------------------------|--------------------------------------------------------------------------------|-----------------------------------------------------------|
| ILMN_1654 | -0.08381 | 0.468018 | 0.891964 | 7.263231 | 7.347043 | -1.05981 | -0.4344  | 0.000877 | 0.053291 | 6.912647  | 7.347043 | -1.35134 | MKNK2     | ILMN_113.NM_19905 | 2872     | 1.5E+08  | NM_19905 | MKNK2        | 19 | 2038113-219p13.3h                                                            | Homo sapiens MAP kinase interacting serine/threonine kinase 2 (MKNK2), trans |                                                                                |                                                           |
| ILMN_1807 | -0.07031 | 0.571663 | 0.922267 | 10.72701 | 10.79733 | -1.04995 | -0.43324 | 0.001782 | 0.080488 | 10.36409  | 10.79733 | -1.35026 | PCNP      | ILMN_761.NM_02035 | 57092    | 9968626  | NM_02035 | PCNP         | 3  | 1013128953q12.3a                                                             | Homo sapiens PEST proteolytic signal containing nuclear protein (PCNP), mRNA |                                                                                |                                                           |
| ILMN_3243 | -0.17715 | 0.214363 | 0.822630 | 8.39805  | -1.12642 | -1.04949 | -0.43298 | 0.003982 | 0.132604 | 7.965074  | 8.39805  | -1.35002 | LOC100131 | ILMN_344.NM_00171 | 1E+08    | 1.69E+08 | XM_00171 | LOC100133692 | 1  | PREDICTED: Homo sapiens similar to cell division cycle 2-like 1 (PITSLRE prR |                                                                              |                                                                                |                                                           |
| ILMN_3296 | -0.04469 | 0.679242 | 0.94363  | 8.169047 | 8.213734 | -1.03146 | -0.43293 | 0.000494 | 0.037943 | 7.788037  | 8.213734 | -1.34997 | XAGE1C    | ILMN_307.NM_00169 | 653048   | 1.48E+08 | NM_00169 | XAGE1C       | X  | 52513451-Xp11.22b                                                            | Homo sapiens X antigen family, member 1C (XAGE1C), transcript variant 2, mf  |                                                                                |                                                           |
| ILMN_3307 | -0.05221 | 0.616943 | 0.933882 | 10.07857 | 10.13078 | -1.03686 | -0.43205 | 0.00305  | 0.030159 | 9.698737  | 10.13078 | -1.34915 | ADRBK1    | ILMN_207.NM_00101 | 156      | 1.49E+08 | NM_00101 | ADRBK1       | X  | 11                                                                           | 66810501-11q13.1f                                                            | Homo sapiens adrenergic, beta, receptor kinase 1 (ADRBK1), mRNA                |                                                           |
| ILMN_1704 | -0.03813 | 0.774601 | 0.965006 | 8.621069 | 8.659202 | -1.02678 | -0.43181 | 0.003299 | 0.120013 | 8.227396  | 8.659202 | -1.34892 | LOC55420  | ILMN_319.NM_00108 | 554203   | 89059857 | XR_00108 | LOC55420     | X  | 73136962-Qx13.2b                                                             | PREDICTED: Homo sapiens hypothetical LOC554203 (LOC554203), misc RNA         |                                                                                |                                                           |
| ILMN_2204 | -0.1211  | 0.307758 | 0.82217  | 9.53019  | 9.651292 | -1.08757 | -0.43041 | 0.001171 | 0.062697 | 9.220882  | 9.651292 | -1.34762 | XKRC2     | ILMN_232.NM_00543 | 7516     | 4885666  | NM_00543 | XKRC2        | X  | 7                                                                            | 1523438347q36.1e                                                             | Homo sapiens X-ray repair complementing defective repair in Chinese hamster    |                                                           |
| ILMN_2167 | -0.10151 | 0.38702  | 0.864984 | 8.370011 | 8.471521 | -1.0729  | -0.42993 | 0.001095 | 0.06058  | 8.041588  | 8.471521 | -1.34717 | DFFA      | ILMN_164.NM_01356 | 1676     | 4713299  | NM_01356 | DFFA         | X  | 15                                                                           | 10521406-1p36.22c                                                            | Homo sapiens DNA fragmentation factor, 45kDa, alpha polypeptide (DFFA), tra    |                                                           |
| ILMN_1199 | -0.18856 | 0.097072 | 0.680151 | 9.52648  | 9.715041 | -1.13963 | -0.42975 | 0.006655 | 0.045086 | 9.852866  | 9.715041 | -1.347   | SCG3      | ILMN_174.NM_01324 | 29106    | 19557464 | NM_01324 | SCG3         | X  | 15                                                                           | 98901199-15q21.2b                                                            | Homo sapiens secretogranin III (SCG3), mRNA                                    |                                                           |
| ILMN_3248 | -0.1369  | 0.256433 | 0.792809 | 6.351856 | 6.48876  | -1.09954 | -0.42878 | 0.001363 | 0.068038 | 6.05998   | 6.48876  | -1.3461  | LOC10013  | ILMN_348.NM_00171 | 1E+08    | 1.69E+08 | XM_00171 | LOC100134147 | ml | PREDICTED: Homo sapiens hypothetical LOC100134147 (LOC100134147), ml         |                                                                              |                                                                                |                                                           |
| ILMN_1846 | -0.17071 | 0.289689 | 0.91177  | 6.637377 | 7.008094 | -1.12561 | -0.42947 | 0.012082 | 0.241341 | 6.579616  | 7.008094 | -1.3458  | HS.66049  | ILMN_73398        | 22803083 | HC009563 |          |              |    | 2                                                                            | 85618337-85618386                                                            | Homo sapiens, clone IMAGE3901628, mRNA                                         |                                                           |
| ILMN_3251 | -0.07498 | 0.574446 | 0.92284  | 8.709032 | 8.784011 | -1.05335 | -0.42652 | 0.00371  | 0.129145 | 8.357488  | 8.784011 | -1.34399 | FLJ14484  | ILMN_334.NM_00210 | 650669   | 1.69E+08 | XR_00210 | FLJ14484     | NA | PREDICTED: Homo sapiens misc_RNA (FLJ14484), miscRNA                         |                                                                              |                                                                                |                                                           |
| ILMN_3244 | -0.16631 | 0.161052 | 0.70492  | 7.958283 | 7.472134 | -1.12219 | -0.4264  | 0.001153 | 0.062507 | 7.045734  | 7.472134 | -1.34388 | MXN1      | ILMN_181.NM_00551 | 3110     | 89257347 | NM_00551 | MXN1         | X  | 7                                                                            | 156797697q36.3c                                                              | Homo sapiens motor neuron and pancreas homeobox 1 (MXN1), transcript vari      |                                                           |
| ILMN_2624 | -0.22144 | 0.076847 | 0.560103 | 7.795442 | 8.016896 | -1.1659  | -0.42519 | 0.001689 | 0.07797  | 7.591695  | 8.016896 | -1.34275 | XCRORF12  | ILMN_152.NM_08075 | 140851   | 50037782 | NM_08075 | XCRORF12     | X  | 20                                                                           | 33289618-20q11.22b                                                           | Homo sapiens chromosome 20 open reading frame 127 (C20orf127), mRNA            |                                                           |
| ILMN_1722 | -0.12524 | 0.28598  | 0.809255 | 8.90687  | 9.032113 | -1.09069 | -0.42351 | 0.00121  | 0.063749 | 8.680867  | 9.032113 | -1.34118 | EL24      | ILMN_879.NM_00487 | 9538     | 5596765  | NM_00487 | EL24         | X  | 11                                                                           | 14295632611q24.2b                                                            | Homo sapiens etoposide induced 2.4 mRNA (EI24), transcript variant 1, mRNA     |                                                           |
| ILMN_1705 | -0.04551 | 0.675837 | 0.944204 | 6.661148 | 6.711661 | -1.03205 | -0.42349 | 0.000659 | 0.045231 | 6.288169  | 6.711661 | -1.34117 | SLC02A1   | ILMN_142.NM_00563 | 6578     | 5302494  | NM_00563 | SLC02A1      | X  | 3                                                                            | 31251133903a22.1e                                                            | Homo sapiens solute carrier organic anion transporter family, member 2A1 (SLU  |                                                           |
| ILMN_1734 | -0.12243 | 0.304723 | 0.82078  | 8.534304 | 8.656737 | -1.08857 | -0.42267 | 0.001435 | 0.07057  | 8.234065  | 8.656737 | -1.34041 | DTNA      | ILMN_285.NM_00139 | 1837     | 42717993 | NM_00139 | DTNA         | X  | 18                                                                           | 30683213-18q12.1g                                                            | Homo sapiens dystrobrevin, alpha (DTNA), transcript variant 7, mRNA            |                                                           |
| ILMN_2343 | -0.00346 | 0.769808 | 0.963753 | 11.98615 | 12.01621 | -1.02105 | -0.42095 | 0.003038 | 0.031727 | 11.599526 | 12.01621 | -1.33881 | BOLA3     | ILMN_182.NM_21255 | 388962   | 78486585 | NM_21255 | BOLA3        | X  | 2                                                                            | 7436270-2p13.1b                                                              | Homo sapiens boIA homolog 3 (E. coli) (BOLA3), transcript variant 1, mRNA      |                                                           |
| ILMN_2082 | -0.01993 | 0.861983 | 0.979341 | 7.801835 | 8.217763 | -1.01391 | -0.41925 | 0.001197 | 0.063459 | 7.402517  | 8.217763 | -1.33723 | SNORD68   | ILMN_259.NM_00245 | 606500   | 72534648 | NR_00245 | SNORD68      | X  | 16                                                                           | 88155340-16q24.3a                                                            | Homo sapiens small nuclear RNA, C/D box 68 (SNORD68), small nuclear R          |                                                           |
| ILMN_1781 | -0.19204 | 0.154898 | 0.69674  | 7.907838 | 8.099878 | -1.14238 | -0.41796 | 0.003967 | 0.13533  | 7.681914  | 8.099878 | -1.33604 | LOC64703  | ILMN_325.NM_03002 | 64703    | 89038498 | XM_03002 | LOC64703     | X  | 15                                                                           | 80089879-15q25.2a                                                            | PREDICTED: Homo sapiens similar to Peptidyl-prolyl cis-trans isomerase NIMA    |                                                           |
| ILMN_2136 | -0.10909 | 0.286901 | 0.80961  | 8.28627  | 8.395363 | -1.07855 | -0.41587 | 0.003086 | 0.031896 | 7.979499  | 8.395363 | -1.33411 | MTE       | ILMN_172.NM_00162 | 644314   | 1.16E+08 | NM_17562 | MTE          | X  | 1                                                                            | 16q13b                                                                       | Homo sapiens metallothionein E (MTE), mRNA                                     |                                                           |
| ILMN_3307 | -0.05643 | 0.627558 | 0.935268 | 10.30381 | 10.36024 | -1.03989 | -0.41573 | 0.00144  | 0.07078  | 9.944505  | 10.36024 | -1.33398 | XAGE1A    | ILMN_306.NM_00109 | 653219   | 1.48E+08 | NM_00109 | XAGE1A       | X  | mf                                                                           | 22585605-52258654                                                            | Homo sapiens X antigen family, member 1A (XAGE1A), transcript variant 3, mf    |                                                           |
| ILMN_1655 | -0.1393  | 0.309451 | 0.822453 | 10.98388 | 11.12317 | -1.01337 | -0.41569 | 0.005054 | 0.155044 | 10.70748  | 11.12317 | -1.33394 | LOC64298  | ILMN_337.NM_02637 | 642989   | 88947340 | NM_02637 | LOC64298     | X  | 1                                                                            | 209413609-209413651                                                          | PREDICTED: Homo sapiens similar to 40S ribosomal protein S25 (LOC64298         |                                                           |
| ILMN_1795 | -0.22032 | 0.097876 | 0.680376 | 6.62025  | 8.40567  | -1.16499 | -0.4155  | 0.003513 | 0.125171 | 8.425072  | 8.40567  | -1.33376 | GOLPH4    | ILMN_179.NM_01449 | 27333    | 29826236 | NM_01449 | GOLPH4       | X  | 3                                                                            | 1692101473q26.2a                                                             | Homo sapiens golgi phosphoprotein 4 (GOLPH4), mRNA                             |                                                           |
| ILMN_2177 | -0.1852  | 0.139448 | 0.679225 | 10.34309 | 10.52869 | -1.13697 | -0.41284 | 0.002399 | 0.098446 | 10.11585  | 10.52869 | -1.3313  | MT1E      | ILMN_212.NM_17561 | 4493     | 83367074 | NM_17561 | MT1E         | X  | 16                                                                           | 55218348-16q13b                                                              | Homo sapiens metallothionein 1E (MT1E), mRNA                                   |                                                           |
| ILMN_1663 | -0.21192 | 0.057744 | 0.504818 | 12.40077 | 12.21898 | -1.15823 | -0.41243 | 0.00075  | 0.048825 | 11.80656  | 12.21898 | -1.33092 | LOC64653  | ILMN_169.NM_01819 | 646531   | 1.13E+08 | XR_01819 | LOC64653     | X  | 7                                                                            | 7q22.2b                                                                      | PREDICTED: Homo sapiens similar to nuclease sensitive element binding prote    |                                                           |
| ILMN_3275 | -0.22047 | 0.062851 | 0.519166 | 10.78614 | 11.00661 | -1.16511 | -0.41195 | 0.001335 | 0.067273 | 10.59466  | 11.00661 | -1.33048 | LOC100131 | ILMN_337.NM_00172 | 1E+08    | 1.69E+08 | XM_00172 | LOC100132457 |    |                                                                              | 6                                                                            | 34824118-34824167                                                              | Homo sapiens similar to Sm protein G (LOC100132457), mRNA |
| ILMN_1878 | -0.0829  | 0.41386  | 0.876399 | 9.633714 | 9.116613 | -1.05914 | -0.41092 | 0.000417 | 0.036522 | 9.305694  | 9.116613 | -1.32953 | HS.544637 | ILMN_308.NM_00174 | NA       | 6663509  | AW276479 |              |    |                                                                              | 6                                                                            | 192585003-14q11.1d                                                             | PREDICTED: Homo sapiens misc_RNA (FLJ39632), miscRNA      |
| ILMN_1805 | -0.14577 | 0.202537 | 0.750309 | 6.995415 | 9.40888  | -1.10609 | -0.41009 | 0.001647 | 0.063459 | 6.730795  | 9.40888  | -1.32877 | FLJ39632  | ILMN_166.NM_01513 | 642447   | 1.13E+08 | XR_01513 | FLJ39632     | X  | 14                                                                           | 19608918-9q22.31b                                                            | Homo sapiens family with sequence similarity 120A opposite strand (FAM120A)    |                                                           |
| ILMN_3238 | -0.12547 | 0.256219 | 0.792763 | 9.461906 | 9.587377 | -1.03906 | -0.41003 | 0.00032  | 0.05445  | 9.177343  | 9.587377 | -1.32872 | FAM120A   | ILMN_169.NM_19884 | 58293    | 1.49E+08 | NM_19884 | FAM120A      | X  | 9                                                                            | 69239594-3p14.1a                                                             | Homo sapiens letmodin 3 (fetal) (LMO3), mRNA                                   |                                                           |
| ILMN_1788 | -0.07202 | 0.514775 | 0.907637 | 8.999689 | 9.071175 | -1.05119 | -0.40921 | 0.001031 | 0.065859 | 8.662506  | 9.071175 | -1.32796 | LMO3      | ILMN_385.NM_19827 | 338999   | 1.69E+08 | NM_19827 | LMO3         | X  | 3                                                                            | 69239594-3p14.1a                                                             | PREDICTED: Homo sapiens hypothetical protein FLJ36131, transcript variant 1    |                                                           |
| ILMN_3181 | -0.17164 | 0.130919 | 0.666352 | 8.950113 | 8.680756 | -1.12634 | -0.4086  | 0.001109 | 0.060952 | 8.272153  | 8.680756 | -1.3274  | FLJ36131  | ILMN_339.NM_00172 | 347744   | 1.13E+08 | XM_00172 | FLJ36131     | X  | 6                                                                            | 6p24.2b                                                                      | PREDICTED: Homo sapiens chromosome 6 open reading frame 52 (C6orf52), i        |                                                           |
| ILMN_1722 | -0.05017 | 0.625122 | 0.935104 | 8.484722 | 8.53489  | -1.03539 | -0.40797 | 0.003052 | 0.039381 | 8.126923  | 8.53489  | -1.3274  | C6orf52   | ILMN_421.NM_93849 | 66984    | 39275705 | NM_02023 | PSMG2        | X  | 18                                                                           | 12706554-18p11.21d                                                           | Homo sapiens proteasome (prosome, macropain) assembly chaperone 2 (PSM         |                                                           |
| ILMN_2088 | -0.0317  | 0.81665  | 0.937772 | 9.746091 | 9.777791 | -1.02222 | -0.40734 | 0.006219 | 0.172624 | 9.370447  | 9.777791 | -1.32624 | PSMG2     | ILMN_180.NM_02023 | 66984    | 39275705 | NM_02023 | PSMG2        | X  | 18                                                                           | 12706554-18p11.21d                                                           | Homo sapiens proteasome (prosome, macropain) assembly chaperone 2 (PSM         |                                                           |
| ILMN_2045 | -0.19012 | 0.128099 | 0.663461 | 9.74097  | 9.931171 | -1.14082 | -0.40655 | 0.002632 | 0.10524  | 9.52462   | 9.931171 | -1.32551 | C1orf97   | ILMN_618.NM_03270 | 84791    | 1.13E+08 | NM_03270 | C1orf97      | X  | 3                                                                            | 1q32.3a                                                                      | Homo sapiens chromosome 1 open reading frame 97 (C1orf97), mRNA                |                                                           |
| ILMN_1742 | -0.05409 | 0.665745 | 0.94319  | 8.537528 | 8.411617 | -1.0382  | -0.40455 | 0.003361 | 0.121705 | 8.007066  | 8.411617 | -1.32368 | GRWD1     | ILMN_180.NM_03148 | 83743    | 15452861 | NM_03148 | GRWD1        | X  | 19                                                                           | 53648780-19q13.32c                                                           | Homo sapiens glutamate-rich WD repeat containing 1 (GRWD1), mRNA               |                                                           |
| ILMN_1674 | -0.08281 | 0.628957 | 0.935775 | 8.533663 | 8.60187  | -1.04841 | -0.40441 | 0.003088 | 0.199134 | 8.197464  | 8.60187  | -1.32354 | NFIC      | ILMN_282.NM_20584 | 4782     | 45050150 | NM_20584 | NFIC         | X  | 10                                                                           | 300095-3-19p13.3f                                                            | Homo sapiens nuclear factor I/C (CCAAT-binding transcription factor) (NFIC), t |                                                           |
| ILMN_1704 | -0.05902 | 0.613019 | 0.932742 | 7.722942 | -1.04176 | -1.04176 | -0.40329 | 0.001926 | 0.084907 | 7.719654  | 7.722942 | -1.32252 | ATP13A2   | ILMN_534.NM_02208 | 23400    | 13435128 | NM_02208 | ATP13A2      | X  | 1                                                                            | 17185182-1p36.13e                                                            | Homo sapiens ATPase type 13A2 (ATP13A2), mRNA                                  |                                                           |
| ILMN_2053 | -0.23282 | 0.097566 | 0.660376 | 9.608007 | 9.293631 | -1.17513 | -0.40296 | 0.006576 | 0.178965 | 8.890674  | 9.293631 | -1.32222 | GADD45A   | ILMN_173.NM_00192 | 1647     | 9790904  | NM_00192 | GADD45A      | X  | 1                                                                            | 67926172-1p31.3a                                                             | Homo sapiens growth arrest and DNA-damage-inducible, alpha (GADD45A), m        |                                                           |
| ILMN_1677 | -0.02182 | 0.887939 | 0.983043 | 10.31829 | 10.34011 | -1.01524 | -0.40252 | 0.015084 | 0.270342 | 9.937504  | 10.34011 | -1.32181 | ALCAM     | ILMN_164.NM_00162 | 214      | 68163410 | NM_00162 | ALCAM        | X  | 3                                                                            | 1052953943q31.1c                                                             | Homo sapiens activated leukocyte cell adhesion molecule (ALCAM), mRNA          |                                                           |
| ILMN_3239 | -0.18136 | 0.132932 | 0.669779 | 8.935584 | 8.576949 | -1.13396 | -0.40192 | 0.002179 | 0.091582 | 8.175024  | 8.576949 | -1.32127 | LOC38976  | ILMN_350.NM_00172 | 389765   | 1.69E+08 | XM_00172 | LOC38976     | X  | 3                                                                            | 9q21.33b                                                                     | PREDICTED: Homo sapiens similar to KIF27C (LOC38976), mRNA                     |                                                           |
| ILMN_2091 | -0.12539 | 0.24687  | 0.787561 | 6.628031 | 6.753416 | -1.0908  | -0.40083 | 0.000935 | 0.058446 | 6.32529   | 6.753416 | -1.32026 | HBM       | ILMN_281.NM_00100 | 3042     | 94538363 | NM_00100 | HBM          | X  | 16                                                                           | 156440-15l16p13.3f                                                           | Homo sapiens hemoglobin, mu (HBM), mRNA                                        |                                                           |
| ILMN_3    |          |          |          |          |          |          |          |          |          |           |          |          |           |                   |          |          |          |              |    |                                                                              |                                                                              |                                                                                |                                                           |

| Probe set ID | Gene Symbol     | Mean(CRPC) | Mean(LPC p-value) | Cf bonferroni | Ratio(CRPC-Fold-Change) | Fold-Change(CRPC vs. LPC) (D)      |
|--------------|-----------------|------------|-------------------|---------------|-------------------------|------------------------------------|
| 1007_s_at    | DDR1            | 6.79479    | 7.48793           | 0.001442      | 0.673618                | 0.618505 -1.6168 CRPC down vs LPC  |
| 200863_s_at  | RAB11A          | 9.0897     | 9.94815           | 6.07E-05      | 0.028358                | 0.551544 -1.81309 CRPC down vs LPC |
| 201028_s_at  | CD99            | 3.89926    | 5.46983           | 5.49E-05      | 0.025627                | 0.336677 -2.97021 CRPC down vs LPC |
| 201034_at    | ADD3            | 6.03953    | 4.84182           | 0.01415       | 1                       | 2.29376 2.29376 CRPC up vs LPC     |
| 201041_s_at  | DUSP1           | 5.95912    | 8.42404           | 2.89E-05      | 0.013511                | 0.181128 -5.52096 CRPC down vs LPC |
| 201580_s_at  | TMX4            | 5.98073    | 5.29818           | 0.001222      | 0.570792                | 1.60497 1.60497 CRPC up vs LPC     |
| 201581_at    | TMX4            | 6.75724    | 7.5767            | 0.005157      | 1                       | 0.566655 -1.76474 CRPC down vs LPC |
| 201776_s_at  | KIAA0494        | 4.2916     | 3.78804           | 0.011116      | 1                       | 1.41771 1.41771 CRPC up vs LPC     |
| 201777_s_at  | KIAA0494        | 2.76738    | 2.91584           | 0.039936      | 1                       | 0.902211 -1.10839 CRPC down vs LPC |
| 202877_s_at  | CD93            | 2.60165    | 2.15127           | 0.000275      | 0.12845                 | 1.3664 1.3664 CRPC up vs LPC       |
| 203318_s_at  | ZNF148          | 5.79275    | 6.65177           | 0.000565      | 0.264069                | 0.551324 -1.81381 CRPC down vs LPC |
| 204347_at    | AK3L1           | 4.23181    | 4.52494           | 0.027969      | 1                       | 0.816134 -1.22529 CRPC down vs LPC |
| 204621_s_at  | NR4A2 NR4A2     | 2.91028    | 3.95635           | 0.007478      | 1                       | 0.484286 -2.0649 CRPC down vs LPC  |
| 204622_x_at  | NR4A2 NR4A2     | 2.81175    | 4.48889           | 0.000813      | 0.379712                | 0.312703 -3.19792 CRPC down vs LPC |
| 205737_at    | KCNQ2           | 1.93301    | 2.09602           | 2.09E-06      | 0.000976                | 0.893159 -1.11962 CRPC down vs LPC |
| 205981_s_at  | ING2            | 3.59333    | 3.94138           | 0.000435      | 0.203372                | 0.785642 -1.27284 CRPC down vs LPC |
| 206061_s_at  | DICER1          | 2.28578    | 2.6911            | 1.53E-06      | 0.000713                | 0.75507 -1.32438 CRPC down vs LPC  |
| 206428_s_at  | ZNF143          | 1.7048     | 1.76872           | 0.009181      | 1                       | 0.956659 -1.0453 CRPC down vs LPC  |
| 207290_at    | PLXNA2          | 2.38106    | 2.46639           | 0.031735      | 1                       | 0.942567 -1.06093 CRPC down vs LPC |
| 207323_s_at  | MBP             | 2.68107    | 2.76502           | 0.029226      | 1                       | 0.943466 -1.05992 CRPC down vs LPC |
| 207357_s_at  | GALNT10         | 2.96631    | 2.68077           | 0.004796      | 1                       | 1.21886 1.21886 CRPC up vs LPC     |
| 208289_s_at  | EI24            | 7.86795    | 7.35567           | 0.003676      | 0.175533                | 1.4263 1.4263 CRPC up vs LPC       |
| 208718_at    | DDX17           | 9.84023    | 9.49121           | 0.002196      | 1                       | 1.27369 1.27369 CRPC up vs LPC     |
| 208779_x_at  | DDR1            | 4.21152    | 4.97581           | 0.000955      | 0.44583                 | 0.588743 -1.69853 CRPC down vs LPC |
| 209018_s_at  | PINK1           | 3.44313    | 3.73488           | 0.00027       | 0.126079                | 0.816905 -1.22413 CRPC down vs LPC |
| 209281_s_at  | ATP2B1          | 3.81409    | 3.12099           | 0.003633      | 1                       | 1.61676 1.61676 CRPC up vs LPC     |
| 209703_x_at  | METTL7A         | 3.78311    | 3.45688           | 0.001298      | 0.606272                | 1.25373 1.25373 CRPC up vs LPC     |
| 209894_at    | LEPR            | 4.75102    | 3.51264           | 0.000618      | 0.288657                | 2.35932 2.35932 CRPC up vs LPC     |
| 209935_at    | ATP2C1          | 4.61897    | 5.55486           | 0.015315      | 1                       | 0.522719 -1.91308 CRPC down vs LPC |
| 210968_s_at  | RTN4 RTN4       | 8.65247    | 9.24543           | 0.000615      | 0.287038                | 0.662978 -1.50834 CRPC down vs LPC |
| 211355_x_at  | LEPR            | 1.98326    | 1.83094           | 0.000637      | 0.297606                | 1.11136 1.11136 CRPC up vs LPC     |
| 211509_s_at  | RTN4 RTN4       | 9.72822    | 10.0478           | 0.033424      | 1                       | 0.80129 -1.24799 CRPC down vs LPC  |
| 212235_at    | PLXND1          | 3.6292     | 2.99626           | 3.05E-07      | 0.000143                | 1.55072 1.55072 CRPC up vs LPC     |
| 212994_at    | THOC2           | 5.7647     | 4.85862           | 0.007333      | 1                       | 1.87396 1.87396 CRPC up vs LPC     |
| 213101_s_at  | ACTR3           | 10.3872    | 9.92597           | 0.000218      | 0.101778                | 1.37668 1.37668 CRPC up vs LPC     |
| 213229_at    | DICER1          | 4.74468    | 6.70308           | 5.64E-05      | 0.026345                | 0.257314 -3.8863 CRPC down vs LPC  |
| 213236_at    | SASH1           | 3.19483    | 3.8054            | 0.001675      | 0.782051                | 0.654941 -1.52686 CRPC down vs LPC |
| 214151_s_at  | CCPG1           | 3.4137     | 4.28559           | 2.78E-05      | 0.013005                | 0.54643 -1.83006 CRPC down vs LPC  |
| 214152_at    | CCPG1           | 2.88356    | 3.70586           | 8.53E-06      | 0.003984                | 0.565538 -1.76823 CRPC down vs LPC |
| 218714_at    | PRR14           | 3.69345    | 3.99097           | 0.046046      | 1                       | 0.813646 -1.22904 CRPC down vs LPC |
| 221156_x_at  | CCPG1           | 2.64706    | 2.87104           | 0.002871      | 1                       | 0.856203 -1.16795 CRPC down vs LPC |
| 221511_x_at  | CCPG1           | 3.4184     | 3.83737           | 0.01082       | 1                       | 0.747954 -1.33698 CRPC down vs LPC |
| 221512_at    | TMEM222         | 2.86846    | 3.36451           | 7.52E-06      | 0.003514                | 0.709045 -1.41035 CRPC down vs LPC |
| 221537_at    | PLXNA1          | 3.36664    | 3.0033            | 2.59E-05      | 0.012084                | 1.2864 1.2864 CRPC up vs LPC       |
| 222076_at    | HBEGF           | 2.30693    | 2.38661           | 0.010163      | 1                       | 0.946267 -1.05678 CRPC down vs LPC |
| 200050_at    | ZNF146          | 9.47196    | 9.17341           | 0.045202      | 1                       | 1.2299 1.2299 CRPC up vs LPC       |
| 200594_x_at  | HNRNPU          | 8.9972     | 8.44941           | 0.00038       | 0.177606                | 1.46185 1.46185 CRPC up vs LPC     |
| 200606_at    | DSP             | 8.92823    | 9.83447           | 0.008044      | 1                       | 0.533577 -1.87414 CRPC down vs LPC |
| 200710_at    | ACADVL          | 7.53881    | 8.15278           | 0.020598      | 1                       | 0.653398 -1.53046 CRPC down vs LPC |
| 200864_s_at  | RAB11A          | 5.68978    | 6.39702           | 0.029307      | 1                       | 0.61249 -1.63268 CRPC down vs LPC  |
| 200906_s_at  | PALLD           | 2.35534    | 2.58537           | 0.001034      | 0.482727                | 0.852614 -1.17286 CRPC down vs LPC |
| 200941_at    | HSBP1           | 6.79229    | 7.92946           | 1.69E-05      | 0.007897                | 0.454651 -2.19949 CRPC down vs LPC |
| 200972_at    | TSPAN3 TSPAN3   | 4.03694    | 4.39701           | 0.028484      | 1                       | 0.779127 -1.28349 CRPC down vs LPC |
| 200976_s_at  | TAX1BP1         | 9.21256    | 9.55359           | 0.020678      | 1                       | 0.789478 -1.26666 CRPC down vs LPC |
| 200983_x_at  | CD59            | 6.28518    | 5.45365           | 0.000979      | 0.45701                 | 1.77956 1.77956 CRPC up vs LPC     |
| 201029_s_at  | CD99            | 9.76855    | 10.3317           | 0.004379      | 1                       | 0.676842 -1.47745 CRPC down vs LPC |
| 201044_x_at  | DUSP1           | 3.06049    | 3.35669           | 3.19E-06      | 0.001491                | 0.814393 -1.22791 CRPC down vs LPC |
| 201739_at    | SGK1            | 5.44414    | 4.2075            | 0.021232      | 1                       | 2.3565 2.3565 CRPC up vs LPC       |
| 201778_s_at  | KIAA0494        | 7.96526    | 8.61169           | 0.000359      | 0.167674                | 0.638858 -1.56529 CRPC down vs LPC |
| 201830_s_at  | NET1            | 4.4776     | 3.60656           | 0.016804      | 1                       | 1.82898 1.82898 CRPC up vs LPC     |
| 202669_s_at  | EFNB2           | 2.14767    | 3.14074           | 0.00057       | 0.266079                | 0.502407 -1.99042 CRPC down vs LPC |
| 202878_s_at  | CD93            | 4.36141    | 2.90004           | 1.79E-06      | 0.000836                | 2.7537 2.7537 CRPC up vs LPC       |
| 203227_s_at  | TSPAN31 TSPAN31 | 4.05458    | 4.50453           | 0.01599       | 1                       | 0.732071 -1.36599 CRPC down vs LPC |
| 203303_at    | DYNLT3          | 7.88873    | 7.17995           | 0.020067      | 1                       | 1.63442 1.63442 CRPC up vs LPC     |
| 203319_s_at  | ZNF148          | 3.28415    | 3.82391           | 7.01E-05      | 0.032752                | 0.687884 -1.45373 CRPC down vs LPC |
| 203440_at    | CDH2            | 3.08936    | 2.80538           | 0.04865       | 1                       | 1.21755 1.21755 CRPC up vs LPC     |
| 203455_s_at  | SAT1            | 10.1491    | 10.6656           | 0.016962      | 1                       | 0.699056 -1.4305 CRPC down vs LPC  |
| 203868_s_at  | VCAM1           | 5.33735    | 3.85767           | 5.73E-05      | 0.026761                | 2.78888 2.78888 CRPC up vs LPC     |
| 204011_at    | SPRY2           | 2.69665    | 2.94818           | 0.001124      | 0.524825                | 0.840004 -1.19047 CRPC down vs LPC |
| 204296_at    | DCTN1           | 2.34056    | 2.50384           | 0.00011       | 0.051236                | 0.892992 -1.11983 CRPC down vs LPC |
| 204348_s_at  | AK3L1           | 4.26185    | 5.49548           | 9.34E-08      | 4.36E-05                | 0.425247 -2.35158 CRPC down vs LPC |
| 204387_x_at  | MRP63           | 9.31058    | 8.7385            | 1.89E-06      | 0.000881                | 1.48666 1.48666 CRPC up vs LPC     |
| 204393_s_at  | ACPP            | 10.3468    | 12.5593           | 1.16E-10      | 5.41E-08                | 0.215764 -4.63469 CRPC down vs LPC |

|             |                     |         |         |          |          |          |          |                  |
|-------------|---------------------|---------|---------|----------|----------|----------|----------|------------------|
| 204474_at   | ZNF142              | 2.95184 | 3.07302 | 0.037779 | 1        | 0.919438 | -1.08762 | CRPC down vs LPC |
| 204745_x_at | MT1G                | 5.9446  | 7.83438 | 1.80E-05 | 0.008409 | 0.269847 | -3.7058  | CRPC down vs LPC |
| 204791_at   | NR2C1               | 3.16163 | 2.79028 | 0.013704 | 1        | 1.29356  | 1.29356  | CRPC up vs LPC   |
| 204854_at   | GPR162 /// LEPREL   | 2.67335 | 2.81052 | 0.00076  | 0.354689 | 0.909301 | -1.09975 | CRPC down vs LPC |
| 205031_at   | EFNB3               | 2.58969 | 2.25161 | 3.15E-08 | 1.47E-05 | 1.26407  | 1.26407  | CRPC up vs LPC   |
| 205133_s_at | HSPE1 HSPE1         | 9.59063 | 9.03913 | 0.004102 | 1        | 1.46561  | 1.46561  | CRPC up vs LPC   |
| 205648_at   | WNT2                | 3.38519 | 3.10437 | 0.033853 | 1        | 1.21488  | 1.21488  | CRPC up vs LPC   |
| 205701_at   | IPO8                | 2.40446 | 2.31608 | 0.042983 | 1        | 1.06317  | 1.06317  | CRPC up vs LPC   |
| 205882_x_at | ADD3                | 5.05618 | 3.94533 | 0.034757 | 1        | 2.15973  | 2.15973  | CRPC up vs LPC   |
| 206461_x_at | MT1H                | 7.66703 | 9.11491 | 0.000161 | 0.07504  | 0.366559 | -2.72807 | CRPC down vs LPC |
| 207092_at   | LEP                 | 3.07666 | 2.95373 | 0.041779 | 1        | 1.08895  | 1.08895  | CRPC up vs LPC   |
| 207377_at   | PPP1R2P9            | 2.50325 | 2.59567 | 0.034015 | 1        | 0.937947 | -1.06616 | CRPC down vs LPC |
| 207585_s_at | RPL36AL             | 9.28269 | 10.1267 | 6.21E-06 | 0.002902 | 0.557092 | -1.79504 | CRPC down vs LPC |
| 207598_x_at | XRCC2               | 5.1523  | 4.68841 | 0.002911 | 1        | 1.37926  | 1.37926  | CRPC up vs LPC   |
| 207656_s_at | ACOX1               | 2.63427 | 2.79575 | 2.41E-05 | 0.011258 | 0.894109 | -1.11843 | CRPC down vs LPC |
| 207798_s_at | ATXN2L              | 2.23    | 2.33202 | 0.010457 | 1        | 0.931727 | -1.07328 | CRPC down vs LPC |
| 207981_s_at | ESRRG               | 2.92132 | 3.37431 | 0.010037 | 1        | 0.730529 | -1.36887 | CRPC down vs LPC |
| 208383_s_at | PKC1                | 2.63859 | 2.75217 | 0.041284 | 1        | 0.924287 | -1.08191 | CRPC down vs LPC |
| 208735_s_at | CTDSP2              | 3.33154 | 3.92609 | 1.28E-06 | 0.000599 | 0.662255 | -1.50999 | CRPC down vs LPC |
| 208890_s_at | PLXNB2              | 6.08033 | 7.09752 | 0.00066  | 0.308037 | 0.494081 | -2.02396 | CRPC down vs LPC |
| 209019_s_at | PINK1               | 6.18517 | 6.78311 | 0.001137 | 0.530977 | 0.660695 | -1.51356 | CRPC down vs LPC |
| 209043_at   | PAPSS1              | 8.57266 | 9.5998  | 0.000581 | 0.271414 | 0.490684 | -2.03797 | CRPC down vs LPC |
| 209072_at   | MBP                 | 2.14899 | 2.32247 | 0.000849 | 0.396323 | 0.886699 | -1.12778 | CRPC down vs LPC |
| 209227_at   | TUSC3               | 3.04729 | 3.56868 | 0.005867 | 1        | 0.696699 | -1.43534 | CRPC down vs LPC |
| 209398_at   | HIST1H1C            | 6.52166 | 8.39693 | 0.000333 | 0.155599 | 0.272577 | -3.66868 | CRPC down vs LPC |
| 209847_at   | CDH17               | 2.579   | 2.30782 | 0.014949 | 1        | 1.20679  | 1.20679  | CRPC up vs LPC   |
| 209893_s_at | FUT4                | 2.41598 | 2.32236 | 0.00853  | 1        | 1.06704  | 1.06704  | CRPC up vs LPC   |
| 210736_x_at | DTNA                | 3.23825 | 3.34183 | 0.041328 | 1        | 0.930724 | -1.07443 | CRPC down vs LPC |
| 210749_x_at | DDR1                | 3.82847 | 4.26627 | 0.043039 | 1        | 0.738258 | -1.35454 | CRPC down vs LPC |
| 210933_s_at | FSCN1               | 3.07297 | 2.87575 | 2.11E-06 | 0.000984 | 1.14649  | 1.14649  | CRPC up vs LPC   |
| 211137_s_at | ATP2C1              | 5.74566 | 6.79969 | 0.018396 | 1        | 0.48162  | -2.07633 | CRPC down vs LPC |
| 211356_x_at | LEPR                | 2.03136 | 1.8775  | 0.001481 | 0.691741 | 1.11254  | 1.11254  | CRPC up vs LPC   |
| 211423_s_at | SC5DL               | 7.63336 | 9.34235 | 0.000172 | 0.080167 | 0.305875 | -3.26931 | CRPC down vs LPC |
| 211424_x_at | METTL7A             | 3.12259 | 2.94487 | 0.048203 | 1        | 1.1311   | 1.1311   | CRPC up vs LPC   |
| 211486_s_at | KCNQ2               | 2.25986 | 2.36304 | 0.028838 | 1        | 0.930975 | -1.07414 | CRPC down vs LPC |
| 211747_s_at | LSM5                | 6.56744 | 6.15506 | 0.03211  | 1        | 1.33088  | 1.33088  | CRPC up vs LPC   |
| 212185_x_at | MT2A                | 8.83896 | 9.77085 | 0.006759 | 1        | 0.524171 | -1.90777 | CRPC down vs LPC |
| 212298_at   | NRP1                | 5.68767 | 4.77328 | 0.034004 | 1        | 1.88477  | 1.88477  | CRPC up vs LPC   |
| 212310_at   | MIA3                | 5.17492 | 6.53219 | 0.003197 | 1        | 0.39032  | -2.562   | CRPC down vs LPC |
| 212586_at   | CAST                | 7.56773 | 8.60201 | 0.000645 | 0.301442 | 0.488259 | -2.04809 | CRPC down vs LPC |
| 212838_at   | DNMBP               | 4.52912 | 5.72664 | 1.38E-09 | 6.46E-07 | 0.436026 | -2.29344 | CRPC down vs LPC |
| 212859_x_at | MT1E                | 7.59458 | 9.3622  | 2.38E-06 | 0.00111  | 0.293693 | -3.40491 | CRPC down vs LPC |
| 212930_at   | ATP2B1              | 2.89636 | 2.61745 | 0.036028 | 1        | 1.21328  | 1.21328  | CRPC up vs LPC   |
| 212942_s_at | KIAA1199            | 2.24225 | 1.98259 | 0.000623 | 0.290874 | 1.1972   | 1.1972   | CRPC up vs LPC   |
| 213030_s_at | PLXNA2              | 2.73023 | 2.54765 | 0.049244 | 1        | 1.13491  | 1.13491  | CRPC up vs LPC   |
| 213102_at   | ACTR3               | 6.61804 | 5.90098 | 0.000538 | 0.251038 | 1.64382  | 1.64382  | CRPC up vs LPC   |
| 213241_at   | PLXNC1              | 3.22574 | 2.85236 | 0.012907 | 1        | 1.29539  | 1.29539  | CRPC up vs LPC   |
| 213298_at   | NFIC                | 2.63003 | 2.86375 | 0.000152 | 0.070902 | 0.850438 | -1.17586 | CRPC down vs LPC |
| 213319_s_at | CSDA                | 2.58208 | 2.89552 | 3.28E-06 | 0.00153  | 0.804724 | -1.24266 | CRPC down vs LPC |
| 213369_at   | PCDH21              | 1.93109 | 2.11073 | 1.52E-06 | 0.000709 | 0.882924 | -1.1326  | CRPC down vs LPC |
| 213544_at   | ING2                | 2.00572 | 1.91179 | 0.001924 | 0.898479 | 1.06728  | 1.06728  | CRPC up vs LPC   |
| 213661_at   | PAMR1               | 4.23116 | 4.84534 | 0.001402 | 0.65487  | 0.653302 | -1.53069 | CRPC down vs LPC |
| 213998_s_at | DDX17               | 3.47357 | 2.80296 | 0.004952 | 1        | 1.59174  | 1.59174  | CRPC up vs LPC   |
| 214364_at   | MTERFD2             | 2.90348 | 3.06254 | 0.011603 | 1        | 0.895607 | -1.11656 | CRPC down vs LPC |
| 214433_s_at | SELENBP1            | 7.7401  | 6.43016 | 0.000952 | 0.444812 | 2.47931  | 2.47931  | CRPC up vs LPC   |
| 214614_at   | MNX1                | 2.99291 | 3.25204 | 0.036365 | 1        | 0.835593 | -1.19675 | CRPC down vs LPC |
| 214620_x_at | PAM                 | 2.91645 | 3.40823 | 0.000998 | 0.46615  | 0.711146 | -1.40618 | CRPC down vs LPC |
| 214629_x_at | RTN4 RTN4           | 10.6131 | 10.9501 | 0.002739 | 1        | 0.791664 | -1.26316 | CRPC down vs LPC |
| 215728_s_at | ACOT7               | 2.45936 | 2.62577 | 0.000582 | 0.271895 | 0.891057 | -1.12226 | CRPC down vs LPC |
| 216027_at   | TMX4                | 2.03269 | 2.10211 | 0.016854 | 1        | 0.953016 | -1.0493  | CRPC down vs LPC |
| 216248_s_at | NR4A2 NR4A2         | 2.92661 | 4.55895 | 0.000878 | 0.409942 | 0.322564 | -3.10016 | CRPC down vs LPC |
| 216264_s_at | LAMB2               | 3.82581 | 5.0392  | 0.000339 | 0.158414 | 0.431255 | -2.31882 | CRPC down vs LPC |
| 216281_at   | DICER1              | 2.33971 | 2.48452 | 0.000145 | 0.067548 | 0.904496 | -1.10559 | CRPC down vs LPC |
| 216336_x_at | MT1E /// MT1H /// M | 5.53953 | 6.66008 | 6.19E-05 | 0.028897 | 0.459917 | -2.17431 | CRPC down vs LPC |
| 216396_s_at | EI24                | 5.61277 | 4.8327  | 0.002374 | 1        | 1.71721  | 1.71721  | CRPC up vs LPC   |
| 217016_x_at | TMEM212             | 3.73991 | 3.45489 | 0.001519 | 0.70923  | 1.21842  | 1.21842  | CRPC up vs LPC   |
| 217256_x_at | RPL36A              | 9.1655  | 9.39183 | 0.045378 | 1        | 0.854805 | -1.16986 | CRPC down vs LPC |
| 217588_at   | CATSPER2 /// CAT5   | 3.25937 | 2.92004 | 4.27E-05 | 0.019918 | 1.26517  | 1.26517  | CRPC up vs LPC   |
| 217844_at   | CTDSP1              | 4.91229 | 5.22949 | 0.000101 | 0.047163 | 0.802626 | -1.24591 | CRPC down vs LPC |
| 217858_s_at | ARMCX3              | 7.20183 | 8.0984  | 0.000553 | 0.258439 | 0.537165 | -1.86163 | CRPC down vs LPC |
| 217875_s_at | PMEPA1 PMEPA1       | 5.09163 | 5.89714 | 0.000169 | 0.078933 | 0.572158 | -1.74777 | CRPC down vs LPC |
| 218113_at   | TMEM2               | 5.06821 | 4.25277 | 0.003464 | 1        | 1.75984  | 1.75984  | CRPC up vs LPC   |
| 218218_at   | APPL2               | 3.53689 | 3.11354 | 0.027444 | 1        | 1.34104  | 1.34104  | CRPC up vs LPC   |
| 218392_x_at | SFXN1               | 4.39663 | 4.03318 | 0.020906 | 1        | 1.2865   | 1.2865   | CRPC up vs LPC   |

|             |                  |         |         |          |          |          |          |                  |
|-------------|------------------|---------|---------|----------|----------|----------|----------|------------------|
| 218633_x_at | ABHD10           | 5.76356 | 6.41625 | 0.017258 | 1        | 0.636092 | -1.5721  | CRPC down vs LPC |
| 218717_s_at | LEPREL1          | 3.00422 | 4.89164 | 0.002635 | 1        | 0.270291 | -3.69972 | CRPC down vs LPC |
| 218765_at   | SIDT2            | 6.76565 | 7.04472 | 0.005923 | 1        | 0.824125 | -1.21341 | CRPC down vs LPC |
| 218868_at   | ACTR3B           | 2.87477 | 2.74294 | 0.026812 | 1        | 1.09568  | 1.09568  | CRPC up vs LPC   |
| 219162_s_at | MRPL11           | 3.80059 | 3.3936  | 7.20E-05 | 0.033628 | 1.32592  | 1.32592  | CRPC up vs LPC   |
| 219259_at   | SEMA4A           | 3.51138 | 3.79868 | 0.000106 | 0.049365 | 0.819432 | -1.22036 | CRPC down vs LPC |
| 219363_s_at | MTERFD1          | 5.2875  | 4.2309  | 2.05E-05 | 0.009579 | 2.08003  | 2.08003  | CRPC up vs LPC   |
| 219390_at   | FKBP14           | 2.99413 | 2.83761 | 0.005885 | 1        | 1.11459  | 1.11459  | CRPC up vs LPC   |
| 219569_s_at | TMEM22           | 2.46258 | 2.34065 | 0.025628 | 1        | 1.08819  | 1.08819  | CRPC up vs LPC   |
| 219690_at   | TMEM149          | 3.45974 | 3.23095 | 0.005514 | 1        | 1.17185  | 1.17185  | CRPC up vs LPC   |
| 219963_at   | DUSP13           | 2.49779 | 2.69394 | 1.89E-05 | 0.008826 | 0.872877 | -1.14564 | CRPC down vs LPC |
| 220038_at   | C8orf44 /// SGK3 | 2.48225 | 2.69939 | 0.004872 | 1        | 0.860273 | -1.16242 | CRPC down vs LPC |
| 220052_s_at | TINF2            | 6.15675 | 6.4096  | 0.006829 | 1        | 0.839235 | -1.19156 | CRPC down vs LPC |
| 220296_at   | GALNT10          | 3.12283 | 2.76968 | 2.88E-05 | 0.013461 | 1.27734  | 1.27734  | CRPC up vs LPC   |
| 220325_at   | TAF7L            | 2.22056 | 2.2997  | 0.033094 | 1        | 0.946621 | -1.05639 | CRPC down vs LPC |
| 220374_at   | KLHL28           | 2.95025 | 2.64808 | 0.010293 | 1        | 1.233    | 1.233    | CRPC up vs LPC   |
| 220558_x_at | TSPAN32 TSPAN32  | 2.85654 | 3.15423 | 0.002104 | 0.982496 | 0.813551 | -1.22918 | CRPC down vs LPC |
| 220803_at   | STAMBPL1         | 2.38193 | 2.48696 | 0.022796 | 1        | 0.929781 | -1.07552 | CRPC down vs LPC |
| 221479_s_at | BNIP3L           | 8.16364 | 7.41766 | 0.02425  | 1        | 1.67712  | 1.67712  | CRPC up vs LPC   |
| 221538_s_at | PLXNA1           | 3.36764 | 2.76456 | 0.006451 | 1        | 1.51896  | 1.51896  | CRPC up vs LPC   |
| 221558_s_at | LEF1 LEF1        | 3.94891 | 2.90739 | 0.000381 | 0.177979 | 2.05839  | 2.05839  | CRPC up vs LPC   |
| 221597_s_at | TMEM208          | 5.44212 | 5.89813 | 0.046507 | 1        | 0.729001 | -1.37174 | CRPC down vs LPC |
| 221873_at   | ZNF143           | 3.62034 | 3.35559 | 0.049745 | 1        | 1.20143  | 1.20143  | CRPC up vs LPC   |
| 222102_at   | GSTA3            | 3.53068 | 3.15331 | 0.016293 | 1        | 1.29898  | 1.29898  | CRPC up vs LPC   |
| 222122_s_at | THOC2            | 7.4082  | 6.54923 | 8.90E-05 | 0.041571 | 1.81374  | 1.81374  | CRPC up vs LPC   |
| 222156_x_at | CCPG1            | 2.65323 | 3.0261  | 0.005089 | 1        | 0.772246 | -1.29492 | CRPC down vs LPC |
| 222264_at   | HNRNPUL2         | 2.76031 | 3.0861  | 2.57E-07 | 0.00012  | 0.797856 | -1.25336 | CRPC down vs LPC |
| 38037_at    | HBEGF            | 3.13556 | 3.33007 | 0.006169 | 1        | 0.873869 | -1.14434 | CRPC down vs LPC |
| 38671_at    | PLXND1           | 4.0295  | 3.27565 | 3.33E-05 | 0.015567 | 1.68629  | 1.68629  | CRPC up vs LPC   |
| 41644_at    | SASH1            | 4.32425 | 5.09562 | 0.002788 | 1        | 0.585863 | -1.70688 | CRPC down vs LPC |
| 44617_at    | OGFOD2           | 2.59031 | 2.45836 | 0.002931 | 1        | 1.09577  | 1.09577  | CRPC up vs LPC   |
| 45687_at    | PRR14            | 4.96714 | 5.82778 | 2.17E-07 | 0.000102 | 0.55071  | -1.81584 | CRPC down vs LPC |
| 52078_at    | TMEM222          | 3.82751 | 4.19695 | 8.04E-05 | 0.037527 | 0.774081 | -1.29185 | CRPC down vs LPC |



ACCEPTED MANUSCRIPT

Probeset ID Gene Symbol Mean(Cancer) Mean(Normal) p-value (Cancer vs. Normal) Fold-Change(Cancer vs. Normal)

|            |          |         |         |          |          |
|------------|----------|---------|---------|----------|----------|
| 226599_at  | FHDC1    | 6.03094 | 8.17619 | 9.16E-15 | -4.42368 |
| 216264_s_a | LAMB2    | 7.51427 | 8.61575 | 2.35E-08 | -2.14574 |
| 204388_s_a | MAOA     | 9.59815 | 8.73517 | 3.88E-05 | 1.81879  |
| 233477_at  | KLK15    | 3.99224 | 2.59891 | 0.000219 | 2.62683  |
| 218439_s_a | COMMD10  | 5.10184 | 4.61776 | 0.00053  | 1.3987   |
| 218729_at  | LXN      | 7.57073 | 8.44795 | 0.00091  | -1.83683 |
| 221462_x_a | KLK15    | 2.35531 | 2.07    | 0.001947 | 1.21867  |
| 209917_s_a | TP53TG1  | 8.18085 | 7.75153 | 0.007276 | 1.3466   |
| 1556601_a  | SPATA13  | 3.16182 | 3.54543 | 0.007563 | -1.3046  |
| 222450_at  | PMEPA1   | 11.8498 | 12.1604 | 0.008439 | -1.24021 |
| 204368_at  | SLCO2A1  | 7.06217 | 7.5319  | 0.010033 | -1.38484 |
| 210241_s_a | TP53TG1  | 6.50186 | 6.15722 | 0.013391 | 1.26983  |
| 210886_x_a | TP53TG1  | 6.01018 | 5.69051 | 0.017051 | 1.24805  |
| 201778_s_a | KIAA0494 | 9.52366 | 9.65807 | 0.017051 | -1.09764 |
| 232770_at  | TUSC3    | 2.01056 | 2.24977 | 0.029175 | -1.18035 |
| 204347_at  | AK3L1    | 6.79349 | 7.1594  | 0.026701 | -1.28869 |
| 204011_at  | SPRY2    | 5.46913 | 7.32445 | 7.39E-16 | -3.61832 |
| 224870_at  | KIAA0114 | 9.03128 | 7.79843 | 1.18E-15 | 2.3503   |
| 224807_at  | GRAMD1A  | 7.26694 | 6.45879 | 9.16E-15 | 1.75096  |
| 207761_s_a | METTL7A  | 9.98384 | 11.3584 | 5.83E-12 | -2.59287 |
| 201406_at  | RPL36A   | 11.6833 | 10.9931 | 8.13E-12 | 1.61351  |
| 56256_at   | SIDT2    | 10.5334 | 11.3783 | 8.23E-12 | -1.79615 |
| 200863_s_a | RAB11A   | 10.9747 | 10.3343 | 1.85E-11 | 1.5587   |
| 218765_at  | SIDT2    | 7.69717 | 8.42201 | 7.27E-11 | -1.65272 |
| 212586_at  | CAST     | 10.4559 | 11.0634 | 7.32E-11 | -1.52356 |
| 228098_s_a | MYLIP    | 8.90186 | 8.08886 | 1.36E-10 | 1.75686  |
| 213062_at  | NTAN1    | 6.94051 | 8.01241 | 2.56E-10 | -2.1022  |
| 223130_s_a | MYLIP    | 8.76253 | 8.09588 | 3.06E-10 | 1.58738  |
| 217256_x_a | RPL36A   | 9.90246 | 9.48859 | 5.77E-10 | 1.33226  |
| 205133_s_a | HSPE1    | 10.1434 | 9.59243 | 6.36E-10 | 1.46511  |
| 233317_at  | CD9      | 2.48529 | 3.4832  | 1.48E-09 | -1.99711 |
| 213061_s_a | NTAN1    | 6.79577 | 7.87367 | 5.67E-09 | -2.11097 |
| 225128_at  | KDELC2   | 6.83248 | 7.83518 | 5.86E-09 | -2.00375 |
| 218718_at  | PDGFC    | 8.35255 | 9.60267 | 1.01E-08 | -2.3786  |
| 207335_x_a | ATP5I    | 10.8891 | 10.585  | 1.27E-08 | 1.23464  |
| 242546_at  | FLJ39632 | 6.78478 | 9.22828 | 2.03E-08 | -5.4396  |
| 201581_at  | TMX4     | 9.42371 | 9.85947 | 2.15E-08 | -1.35263 |
| 231882_at  | FLJ39632 | 5.24763 | 7.23972 | 3.33E-08 | -3.97812 |
| 222719_s_a | PDGFC    | 1.53539 | 1.87915 | 3.43E-08 | -1.26906 |
| 235231_at  | ZNF789   | 6.64903 | 7.99422 | 4.49E-08 | -2.54064 |
| 223129_x_a | MYLIP    | 7.43617 | 6.71042 | 5.08E-08 | 1.65376  |
| 226996_at  | LCLAT1   | 9.13459 | 8.57169 | 7.7E-08  | 1.47724  |
| 210510_s_a | NRP1     | 5.0994  | 2.96192 | 1.24E-07 | 4.39993  |
| 223032_x_a | PRELID1  | 8.7443  | 8.30915 | 1.28E-07 | 1.35205  |
| 211509_s_a | RTN4     | 11.8304 | 12.2308 | 1.49E-07 | -1.31984 |
| 218113_at  | TMEM2    | 6.24181 | 5.08427 | 1.69E-07 | 2.23076  |
| 221269_s_a | SH3BGRL3 | 7.07668 | 6.2079  | 1.91E-07 | 1.82611  |
| 209281_s_a | ATP2B1   | 7.39793 | 6.46638 | 1.96E-07 | 1.90732  |
| 223044_at  | SLC40A1  | 9.85622 | 10.527  | 3.23E-07 | -1.59188 |
| 200985_s_a | CD59     | 9.37779 | 9.82713 | 3.27E-07 | -1.36542 |
| 218421_at  | CERK     | 3.60365 | 4.78712 | 3.92E-07 | -2.27123 |
| 205031_at  | EFNB3    | 2.17225 | 2.63051 | 5.25E-07 | -1.37388 |
| 201032_at  | BLCAP    | 9.52611 | 9.9179  | 5.28E-07 | -1.31203 |
| 200897_s_a | PALLD    | 10.1388 | 10.9257 | 8.37E-07 | -1.72529 |
| 1557535_at | PALLD    | 1.98419 | 2.42443 | 8.59E-07 | -1.35684 |
| 228097_at  | MYLIP    | 2.74223 | 2.23938 | 1.14E-06 | 1.417    |
| 201034_at  | ADD3     | 9.37704 | 10.5699 | 1.14E-06 | -2.28604 |
| 235591_at  | SSTR1    | 4.60946 | 2.20448 | 1.26E-06 | 5.2963   |

|            |           |         |         |          |          |
|------------|-----------|---------|---------|----------|----------|
| 223776_x_a | TINF2     | 7.6666  | 7.3014  | 1.31E-06 | 1.28806  |
| 220319_s_a | MYLIP     | 6.07291 | 5.19404 | 1.33E-06 | 1.83894  |
| 227279_at  | TCEAL3    | 9.60261 | 9.97359 | 1.61E-06 | -1.29323 |
| 212463_at  | CD59      | 8.38732 | 8.93929 | 1.76E-06 | -1.46609 |
| 200907_s_a | PALLD     | 7.78577 | 8.68495 | 1.91E-06 | -1.865   |
| 201951_at  | ALCAM     | 9.28136 | 8.60671 | 2.02E-06 | 1.59621  |
| 200864_s_a | RAB11A    | 9.27571 | 8.79493 | 2.08E-06 | 1.3955   |
| 214629_x_a | RTN4      | 11.4944 | 11.8457 | 2.21E-06 | -1.27572 |
| 201931_at  | ETFA      | 9.42661 | 8.94496 | 2.55E-06 | 1.39634  |
| 221478_at  | BNIP3L    | 9.00509 | 9.48698 | 3.19E-06 | -1.39656 |
| 227812_at  | TNFRSF19  | 7.40882 | 9.514   | 3.91E-06 | -4.3025  |
| 204393_s_a | ACPP      | 12.9258 | 13.5261 | 4.21E-06 | -1.51603 |
| 209492_x_a | ATP5I     | 11.2499 | 10.9652 | 4.41E-06 | 1.21822  |
| 214076_at  | GFOD2     | 4.91321 | 4.20756 | 5.71E-06 | 1.63088  |
| 205882_x_a | ADD3      | 6.28688 | 8.01072 | 5.72E-06 | -3.30314 |
| 211747_s_a | LSM5      | 9.24178 | 8.77983 | 6.26E-06 | 1.3774   |
| 201752_s_a | ADD3      | 6.39712 | 7.81996 | 9.24E-06 | -2.68113 |
| 204949_at  | ICAM3     | 7.99766 | 7.41117 | 9.62E-06 | 1.50159  |
| 201753_s_a | ADD3      | 8.40729 | 9.62706 | 9.72E-06 | -2.3291  |
| 214614_at  | MNX1      | 4.41113 | 3.69357 | 1.07E-05 | 1.6444   |
| 224809_x_a | TINF2     | 8.61001 | 8.30726 | 1.6E-05  | 1.2335   |
| 201005_at  | CD9       | 12.1738 | 12.7811 | 2.09E-05 | -1.52338 |
| 201952_at  | ALCAM     | 11.3084 | 10.871  | 2.64E-05 | 1.35415  |
| 204389_at  | MAOA      | 7.42044 | 6.3699  | 3.65E-05 | 2.07131  |
| 200984_s_a | CD59      | 8.26056 | 8.84578 | 3.88E-05 | -1.50027 |
| 215198_s_a | CALD1     | 2.88448 | 3.21388 | 4.09E-05 | -1.25649 |
| 222444_at  | ARMCX3    | 10.2513 | 10.5754 | 4.62E-05 | -1.25184 |
| 223001_at  | OSTC      | 8.84079 | 8.4625  | 7.45E-05 | 1.29981  |
| 224232_s_a | PRELID1   | 7.99069 | 7.5665  | 9E-05    | 1.34182  |
| 235834_at  | CALD1     | 3.99276 | 4.69752 | 9.56E-05 | -1.62988 |
| 230069_at  | SFXN1     | 3.78778 | 4.5043  | 0.000101 | -1.64321 |
| 212185_x_a | MT2A      | 10.7302 | 11.574  | 0.000114 | -1.79483 |
| 210968_s_a | RTN4      | 11.1878 | 11.5224 | 0.000117 | -1.26104 |
| 227291_s_a | BOLA3     | 10.0136 | 9.67742 | 0.000147 | 1.26237  |
| 200906_s_a | PALLD     | 8.18246 | 9.05688 | 0.000152 | -1.83327 |
| 220052_s_a | TINF2     | 5.59439 | 5.22159 | 0.000198 | 1.29486  |
| 201830_s_a | NET1      | 7.95562 | 7.32717 | 0.000208 | 1.5459   |
| 215716_s_a | ATP2B1    | 7.14532 | 6.50821 | 0.000213 | 1.5552   |
| 1569194_at | ZNF789    | 2.31569 | 2.70783 | 0.000218 | -1.31233 |
| 228938_at  | MBP       | 1.65384 | 1.55444 | 0.000256 | 1.07133  |
| 235603_at  | HNRNPU    | 3.75165 | 4.35868 | 0.000303 | -1.52312 |
| 225912_at  | TP53INP1  | 11.3088 | 10.9529 | 0.00033  | 1.27976  |
| 1563505_at | DUSP16    | 2.19087 | 2.47057 | 0.000334 | -1.21394 |
| 209019_s_a | PINK1     | 8.54603 | 8.87632 | 0.000347 | -1.25727 |
| 209043_at  | PAPSS1    | 9.14612 | 8.72829 | 0.000364 | 1.33591  |
| 225395_s_a | FAM120AOS | 8.91891 | 8.65434 | 0.000406 | 1.20128  |
| 1555867_at | GNG4      | 6.91025 | 8.35939 | 0.000453 | -2.73045 |
| 224973_at  | FAM46A    | 4.52479 | 5.1941  | 0.000466 | -1.59032 |
| 209072_at  | MBP       | 2.27163 | 2.01966 | 0.000572 | 1.19083  |
| 224832_at  | DUSP16    | 8.08693 | 8.52225 | 0.000651 | -1.35221 |
| 202165_at  | PPP1R2    | 5.52943 | 5.8762  | 0.000741 | -1.2717  |
| 206461_x_a | MT1H      | 8.92277 | 9.84938 | 0.000794 | -1.9008  |
| 218976_at  | DNAJC12   | 5.69057 | 4.5743  | 0.000812 | 2.16785  |
| 204745_x_a | MT1G      | 9.83788 | 10.8208 | 0.000824 | -1.9764  |
| 1561365_at | NRP1      | 2.05906 | 1.84801 | 0.000995 | 1.15753  |
| 221766_s_a | FAM46A    | 7.50424 | 8.24271 | 0.001049 | -1.66841 |
| 212930_at  | ATP2B1    | 4.96472 | 4.50472 | 0.001089 | 1.37554  |
| 211423_s_a | SC5DL     | 10.565  | 10.9049 | 0.001102 | -1.26567 |
| 212859_x_a | MT1E      | 9.5521  | 10.5071 | 0.001242 | -1.93862 |

|                     |         |         |          |          |
|---------------------|---------|---------|----------|----------|
| 201777_s_a KIAA0494 | 6.43988 | 5.86778 | 0.001434 | 1.48668  |
| 202770_s_a CCNG2    | 8.34466 | 7.88651 | 0.001537 | 1.37377  |
| 1554544_a MBP       | 4.71801 | 4.27151 | 0.001546 | 1.36273  |
| 218085_at CHMP5     | 10.7218 | 10.9256 | 0.001725 | -1.15178 |
| 200026_at RPL34     | 11.9798 | 11.8122 | 0.001834 | 1.1232   |
| 229524_at KIAA0494  | 1.92013 | 1.80464 | 0.001985 | 1.08334  |
| 205525_at CALD1     | 5.05614 | 5.62741 | 0.00213  | -1.48583 |
| 201615_x_a CALD1    | 9.29003 | 9.85843 | 0.0022   | -1.48288 |
| 221028_s_a GFOD2    | 4.1421  | 3.71942 | 0.002222 | 1.34041  |
| 238127_at FLJ41484  | 3.88056 | 3.12507 | 0.002228 | 1.68821  |
| 219197_s_a SCUBE2   | 6.25645 | 8.12277 | 0.002271 | -3.64599 |
| 238063_at TMEM154   | 2.95914 | 3.5642  | 0.00245  | -1.52104 |
| 202769_at CCNG2     | 12.1356 | 11.9296 | 0.002562 | 1.15351  |
| 211559_s_a CCNG2    | 2.4387  | 2.162   | 0.002669 | 1.21142  |
| 225407_at MBP       | 8.0136  | 7.58797 | 0.002711 | 1.34316  |
| 214552_s_a RABEP1   | 6.68184 | 6.09626 | 0.002866 | 1.50064  |
| 242307_at ZNF789    | 2.06282 | 2.24417 | 0.002879 | -1.13394 |
| 210883_x_a EFNB3    | 2.23207 | 2.11774 | 0.002886 | 1.08247  |
| 221479_s_a BNIP3L   | 7.89238 | 8.22423 | 0.002918 | -1.25862 |
| 203223_at RABEP1    | 4.10377 | 3.41792 | 0.00305  | 1.60866  |
| 221511_x_a CCPG1    | 7.27613 | 7.66997 | 0.003085 | -1.31389 |
| 209112_at CDKN1B    | 9.85088 | 10.1359 | 0.003139 | -1.2184  |
| 202071_at SDC4      | 8.51812 | 9.185   | 0.003286 | -1.58763 |
| 200710_at ACADVL    | 9.71694 | 10.1402 | 0.003453 | -1.34098 |
| 217816_s_a PCNP     | 9.84232 | 9.99967 | 0.003638 | -1.11524 |
| 207357_s_a GALNT10  | 4.7775  | 4.21483 | 0.00393  | 1.477    |
| 227153_at IMMP2L    | 6.19145 | 5.83942 | 0.004205 | 1.27635  |
| 231832_at GALNT4    | 5.78784 | 6.26294 | 0.004503 | -1.39001 |
| 201580_s_a TMX4     | 6.82058 | 7.21547 | 0.004544 | -1.31484 |
| 230485_at LOC644844 | 2.89978 | 2.69363 | 0.00464  | 1.15361  |
| 1555351_s_PPHLN1    | 2.747   | 2.46627 | 0.005069 | 1.21481  |
| 201829_at NET1      | 9.60511 | 9.33617 | 0.005466 | 1.20492  |
| 214152_at CCPG1     | 8.45482 | 8.71906 | 0.005519 | -1.20101 |
| 209703_x_a METTL7A  | 2.5643  | 2.81196 | 0.006227 | -1.18729 |
| 227962_at ACOX1     | 6.57929 | 6.89479 | 0.006288 | -1.24444 |
| 217875_s_a PMEPA1   | 9.24476 | 9.65001 | 0.006448 | -1.32433 |
| 233322_at CD9       | 2.11362 | 2.01309 | 0.006623 | 1.07217  |
| 222156_x_a CCPG1    | 5.76095 | 6.21795 | 0.006879 | -1.37268 |
| 244721_at TP53INP1  | 2.48848 | 2.3657  | 0.006948 | 1.08883  |
| 225817_at CGNL1     | 9.0842  | 9.40337 | 0.007428 | -1.24761 |
| 240336_at HBM       | 1.64326 | 1.55651 | 0.008174 | 1.06198  |
| 221558_s_a LEF1     | 5.12671 | 4.2538  | 0.008207 | 1.83134  |
| 204386_s_a MRP63    | 10.8238 | 10.6354 | 0.008549 | 1.1395   |
| 228748_at CD59      | 3.27452 | 3.68198 | 0.008787 | -1.32635 |
| 200942_s_a HSBP1    | 8.13305 | 7.87333 | 0.009627 | 1.19724  |
| 219854_at ZNF14     | 6.31057 | 6.60392 | 0.010304 | -1.22548 |
| 218376_s_a MICAL1   | 6.01476 | 6.55971 | 0.010382 | -1.45897 |
| 212994_at THOC2     | 7.68123 | 7.42736 | 0.010685 | 1.1924   |
| 235311_at FKBP14    | 2.69651 | 3.07088 | 0.010818 | -1.29627 |
| 209077_at TXN2      | 8.64917 | 8.45911 | 0.010846 | 1.14081  |
| 226304_at HSPB6     | 2.13164 | 2.27709 | 0.011369 | -1.10607 |
| 234072_at SEMA4A    | 2.55902 | 2.74918 | 0.011793 | -1.1409  |
| 201776_s_a KIAA0494 | 7.01422 | 6.62922 | 0.011942 | 1.30586  |
| 200976_s_a TAX1BP1  | 9.81503 | 9.63981 | 0.012568 | 1.12914  |
| 1569847_at CGNL1    | 4.47048 | 4.97419 | 0.012738 | -1.41785 |
| 218774_at DCPS      | 4.42209 | 4.04886 | 0.01315  | 1.29525  |
| 210136_at MBP       | 7.99522 | 7.44549 | 0.013164 | 1.46381  |
| 203304_at BAMBI     | 7.36    | 6.29589 | 0.013352 | 2.09089  |
| 230555_s_a MED30    | 1.82061 | 1.73241 | 0.013435 | 1.06304  |

|            |          |         |         |          |          |
|------------|----------|---------|---------|----------|----------|
| 212077_at  | CALD1    | 11.7094 | 11.9202 | 0.014109 | -1.15729 |
| 208289_s_a | EI24     | 8.79584 | 8.65419 | 0.014586 | 1.10317  |
| 231881_at  | CALD1    | 1.94049 | 2.11276 | 0.015479 | -1.12683 |
| 209263_x_a | TSPAN4   | 6.84357 | 7.17854 | 0.015805 | -1.26135 |
| 213998_s_a | DDX17    | 10.3967 | 10.7013 | 0.015885 | -1.23507 |
| 202904_s_a | LSM5     | 5.59489 | 5.1307  | 0.016136 | 1.37954  |
| 226628_at  | THOC2    | 7.53647 | 7.30165 | 0.016291 | 1.17676  |
| 203986_at  | STBD1    | 5.96903 | 5.42146 | 0.017352 | 1.46162  |
| 221350_at  | HOXC8    | 2.5006  | 2.3626  | 0.017639 | 1.10038  |
| 231915_at  | ZSWIM4   | 2.65348 | 2.44452 | 0.017686 | 1.15585  |
| 200996_at  | ACTR3    | 10.2459 | 10.022  | 0.019129 | 1.16785  |
| 219690_at  | TMEM149  | 5.02724 | 4.68847 | 0.019328 | 1.26468  |
| 207323_s_a | MBP      | 2.80997 | 2.67919 | 0.019517 | 1.09489  |
| 1552944_a  | PANX2    | 2.54187 | 2.44433 | 0.019746 | 1.06995  |
| 1555399_a  | DUSP16   | 2.99699 | 2.86117 | 0.020477 | 1.09871  |
| 227707_at  | MYLIP    | 1.82563 | 1.73193 | 0.020939 | 1.0671   |
| 226626_at  | THOC2    | 8.84925 | 8.66932 | 0.021663 | 1.13283  |
| 202100_at  | RALB     | 8.96261 | 9.22968 | 0.022582 | -1.20335 |
| 201023_at  | TAF7     | 10.1016 | 9.96563 | 0.022741 | 1.09881  |
| 211137_s_a | ATP2C1   | 9.67019 | 9.89307 | 0.023741 | -1.16706 |
| 219356_s_a | CHMP5    | 8.64918 | 8.82141 | 0.023943 | -1.1268  |
| 1554685_a  | KIAA1199 | 1.87933 | 1.81753 | 0.023999 | 1.04376  |
| 1555350_at | PPHLN1   | 2.53887 | 2.3674  | 0.024147 | 1.12621  |
| 210592_s_a | SAT1     | 11.9959 | 11.767  | 0.024545 | 1.17189  |
| 232055_at  | SFXN1    | 2.62505 | 2.84883 | 0.024643 | -1.16779 |
| 230360_at  | GLDN     | 2.07103 | 2.25982 | 0.02532  | -1.13981 |
| 201616_s_a | CALD1    | 6.20512 | 6.61818 | 0.027666 | -1.3315  |
| 214484_s_a | SIGMAR1  | 4.77049 | 4.53986 | 0.027683 | 1.17334  |
| 209078_s_a | TXN2     | 5.34033 | 5.11572 | 0.028282 | 1.16846  |
| 224336_s_a | DUSP16   | 4.95213 | 5.25019 | 0.028553 | -1.22949 |
| 201401_s_a | ADRBK1   | 3.24554 | 3.07877 | 0.028757 | 1.12254  |
| 237577_at  | PCNP     | 3.09222 | 3.36987 | 0.029125 | -1.21222 |
| 204983_s_a | GPC4     | 2.43599 | 2.16956 | 0.029953 | 1.20283  |
| 212298_at  | NRP1     | 5.12326 | 4.27199 | 0.030105 | 1.80408  |
| 225064_at  | RABEP1   | 7.68627 | 7.25706 | 0.032178 | 1.3465   |
| 222122_s_a | THOC2    | 10.0031 | 9.78622 | 0.032192 | 1.16224  |
| 236754_at  | PPP1R2   | 4.28558 | 4.51075 | 0.032758 | -1.16891 |
| 223199_at  | MKNK2    | 7.90817 | 7.64244 | 0.033047 | 1.20224  |
| 1554339_a  | COG3     | 2.11956 | 2.41262 | 0.03308  | -1.22523 |
| 237030_at  | ACPP     | 8.94445 | 9.42103 | 0.03328  | -1.39144 |
| 200972_at  | TSPAN3   | 9.9883  | 10.2374 | 0.033923 | -1.18842 |
| 1552430_at | WDR17    | 2.04723 | 1.9684  | 0.038327 | 1.05616  |
| 203006_at  | INPP5A   | 9.14741 | 9.33384 | 0.039062 | -1.13794 |
| 210611_s_a | DTNA     | 1.89753 | 1.77436 | 0.039455 | 1.08912  |
| 218633_x_a | ABHD10   | 8.62215 | 8.41792 | 0.039776 | 1.15207  |
| 222102_at  | GSTA3    | 2.0571  | 1.93826 | 0.04233  | 1.08586  |
| 236324_at  | MBP      | 1.85072 | 1.77318 | 0.042546 | 1.05521  |
| 231002_s_a | RABEP1   | 6.05711 | 5.82117 | 0.043057 | 1.17767  |
| 214151_s_a | CCPG1    | 7.72294 | 7.92779 | 0.044302 | -1.15256 |
| 223721_s_a | DNAJC12  | 2.99947 | 2.70414 | 0.046833 | 1.22716  |
| 201402_at  | ADRBK1   | 3.53522 | 3.44005 | 0.047111 | 1.06819  |
| 233123_at  | SLC40A1  | 2.51377 | 2.72889 | 0.048446 | -1.1608  |
| 203266_s_a | MAP2K4   | 7.43644 | 7.64833 | 0.048861 | -1.15821 |
| 215213_at  | NUP54    | 1.71623 | 1.77863 | 0.049781 | -1.0442  |

## Significant Probe sets (p&lt;0.05 vs. Normal) Unique in each condition

## Overlaps among different conditions

| GP3                         | GP4                | GP5                                                                            | Met                                                                | GP3       | GP4                | GP5                                               | Met                 | GP3-4                                 | GP3-5                                                             | GP4-5              | Gp3-Met                                | GP4-Met            | GP5-Met   | GP3-4-5            | GP3-4-Met          | GP3-5-Met                             | GP4-5-Met | GP3-4-5-M |           |           |                                               |                             |                                                                           |                    |                                      |           |           |                    |           |                                               |                    |                                                         |                    |                    |                    |           |                    |                             |                                        |           |                             |                    |                                               |                    |                             |                    |                                        |           |                             |           |           |           |           |                    |                    |                                      |           |                             |           |             |                    |                                                        |           |           |           |           |           |           |                    |                                                        |                             |                    |           |           |           |                    |                                                        |           |                      |             |                                                                                            |             |           |           |           |           |                    |                                               |             |             |                    |           |           |           |                             |           |             |           |           |                             |           |           |                    |                               |           |                    |           |           |           |           |                    |                             |           |                             |           |           |           |                    |           |                    |           |                             |                    |           |                    |                    |             |           |           |                    |           |           |           |           |           |                    |           |           |           |                              |           |           |                    |           |                                                |                    |             |                    |           |           |                    |                    |           |                                      |           |           |                    |             |                    |           |           |           |           |           |                      |                                      |                             |                    |                             |                       |           |           |           |                                               |           |           |           |                    |                    |           |           |           |           |                    |                    |                    |                    |           |                             |                    |           |                    |           |           |                                        |           |                    |             |                    |           |           |                    |                      |           |          |           |            |           |          |           |           |          |           |           |                              |           |           |          |                                                 |           |          |           |           |           |                    |             |                            |           |           |           |                             |           |             |           |                                                 |           |                                      |           |           |                    |           |           |           |           |           |           |             |           |           |                               |                    |           |           |           |           |           |                      |           |
|-----------------------------|--------------------|--------------------------------------------------------------------------------|--------------------------------------------------------------------|-----------|--------------------|---------------------------------------------------|---------------------|---------------------------------------|-------------------------------------------------------------------|--------------------|----------------------------------------|--------------------|-----------|--------------------|--------------------|---------------------------------------|-----------|-----------|-----------|-----------|-----------------------------------------------|-----------------------------|---------------------------------------------------------------------------|--------------------|--------------------------------------|-----------|-----------|--------------------|-----------|-----------------------------------------------|--------------------|---------------------------------------------------------|--------------------|--------------------|--------------------|-----------|--------------------|-----------------------------|----------------------------------------|-----------|-----------------------------|--------------------|-----------------------------------------------|--------------------|-----------------------------|--------------------|----------------------------------------|-----------|-----------------------------|-----------|-----------|-----------|-----------|--------------------|--------------------|--------------------------------------|-----------|-----------------------------|-----------|-------------|--------------------|--------------------------------------------------------|-----------|-----------|-----------|-----------|-----------|-----------|--------------------|--------------------------------------------------------|-----------------------------|--------------------|-----------|-----------|-----------|--------------------|--------------------------------------------------------|-----------|----------------------|-------------|--------------------------------------------------------------------------------------------|-------------|-----------|-----------|-----------|-----------|--------------------|-----------------------------------------------|-------------|-------------|--------------------|-----------|-----------|-----------|-----------------------------|-----------|-------------|-----------|-----------|-----------------------------|-----------|-----------|--------------------|-------------------------------|-----------|--------------------|-----------|-----------|-----------|-----------|--------------------|-----------------------------|-----------|-----------------------------|-----------|-----------|-----------|--------------------|-----------|--------------------|-----------|-----------------------------|--------------------|-----------|--------------------|--------------------|-------------|-----------|-----------|--------------------|-----------|-----------|-----------|-----------|-----------|--------------------|-----------|-----------|-----------|------------------------------|-----------|-----------|--------------------|-----------|------------------------------------------------|--------------------|-------------|--------------------|-----------|-----------|--------------------|--------------------|-----------|--------------------------------------|-----------|-----------|--------------------|-------------|--------------------|-----------|-----------|-----------|-----------|-----------|----------------------|--------------------------------------|-----------------------------|--------------------|-----------------------------|-----------------------|-----------|-----------|-----------|-----------------------------------------------|-----------|-----------|-----------|--------------------|--------------------|-----------|-----------|-----------|-----------|--------------------|--------------------|--------------------|--------------------|-----------|-----------------------------|--------------------|-----------|--------------------|-----------|-----------|----------------------------------------|-----------|--------------------|-------------|--------------------|-----------|-----------|--------------------|----------------------|-----------|----------|-----------|------------|-----------|----------|-----------|-----------|----------|-----------|-----------|------------------------------|-----------|-----------|----------|-------------------------------------------------|-----------|----------|-----------|-----------|-----------|--------------------|-------------|----------------------------|-----------|-----------|-----------|-----------------------------|-----------|-------------|-----------|-------------------------------------------------|-----------|--------------------------------------|-----------|-----------|--------------------|-----------|-----------|-----------|-----------|-----------|-----------|-------------|-----------|-----------|-------------------------------|--------------------|-----------|-----------|-----------|-----------|-----------|----------------------|-----------|
| 214552_s_201041_s_204011_at | 201041_s_1007_s_at | 1553323_a_1554339_a_1554685_a_1555350_a_1564010_a_202101_s_1552430_a_200710_at | 210592_s_200983_x_200984_s_1563505_a_1555351_s_1557535_a_224832_at | 204011_at | 210510_s_204011_at | 1554868_s_1555399_a_1554757_a_1555765_a_201032_at | 1569194_a_203986_at | 1554544_a_200977_s_214151_s_202769_at | 200985_s_1569847_a_1555867_a_200863_s_218633_x_210510_s_235591_at | 210510_s_200606_at | 200593_s_1563112_a_1559023_a_201034_at | 200942_s_204708_at | 200026_at | 201401_s_214152_at | 207323_s_201005_at | 201830_s_1561365_a_200864_s_200606_at | 235591_at | 226996_at | 235591_at | 201402_at | 201580_s_200973_s_200594_x_201753_s_203006_at | 208719_s_201617_x_203277_at | 214880_x_211509_s_201041_s_209019_s_200976_s_200897_s_1554868_s_226996_at | 206461_x_226996_at | 201752_s_201777_s_201160_s_200996_at | 202071_at | 203223_at | 213998_s_201829_at | 205184_at | 217774_s_214629_x_201616_s_220319_s_201023_at | 200906_s_203303_at | 206461_x_1557535_a_206461_x_201778_s_203060_s_201276_at | 201044_x_202100_at | 204386_s_221478_at | 210095_s_209935_at | 218774_at | 218439_s_205525_at | 201615_x_200907_s_226628_at | 1557535_a_212185_x_1557535_a_203303_at | 203304_at | 202166_s_201564_s_202165_at | 207357_s_226895_at | 212143_s_211559_s_221558_s_227787_s_207222_at | 201776_s_201406_at | 211137_s_212185_x_233317_at | 212185_x_205737_at | 203441_s_202904_s_203058_s_202336_s_at | 234966_at | 221028_s_221479_s_234072_at | 228097_at | 209043_at | 201952_at | 201581_at | 231002_s_233317_at | 204745_x_233317_at | 205882_x_208151_x_203266_s_203821_at | 207602_at | 222122_s_221511_x_243084_at | 230906_at | 211423_s_at | 203265_s_201931_at | 207169_x_204745_x_221269_s_204745_x_207169_x_208482_at | 203440_at | 204347_at | 209072_at | 223467_at | 223199_at | 212077_at | 204388_s_201951_at | 217816_s_221269_s_212859_x_221269_s_208779_x_209892_at | 204983_s_204621_s_209112_at | 224336_s_231832_at | 230972_at | 235311_at | 214076_at | 204745_x_204011_at | 223217_s_209281_s_207335_x_212942_s_210508_s_212741_at | 205302_at | 205107_s_209917_s_at | 214767_s_at | 206461_x_204393_s_209966_x_207335_x_200863_s_209281_s_210749_x_212958_x_208289_s_205814_at | 210241_s_at | 218113_at | 212298_at | 204949_at | 205737_at | 200863_s_201406_at | 207335_x_211137_s_214620_x_209703_x_208718_at | 210883_x_at | 224809_x_at | 212859_x_205031_at | 201402_at | 201406_at | 227962_at | 200863_s_214552_s_219390_at | 210472_at | 210886_x_at | 225407_at | 212930_at | 205133_s_205882_x_227962_at | 224807_at | 201406_at | 217816_s_221350_at | 211486_s_210933_s_210968_s_at | 225912_at | 215716_s_205569_at | 243346_at | 224807_at | 225128_at | 227962_at | 218633_x_226022_at | 213319_s_212942_s_212994_at | 228748_at | 218376_s_207335_x_244808_at | 225128_at | 214152_at | 224807_at | 218995_s_227153_at | 213544_at | 213101_s_218085_at | 230069_at | 225395_s_207761_s_222802_at | 224809_x_212586_at | 225128_at | 219356_s_228081_at | 213988_s_213236_at | 218205_s_at | 235834_at | 226304_at | 209281_s_244721_at | 212586_at | 242546_at | 214152_at | 222637_at | 229524_at | 216280_s_215064_at | 218421_at | 222637_at | 242546_at | 1555867_a_224809_x_222802_at | 231301_at | 216281_at | 216248_s_218729_at | 1007_s_at | 1555867_a_223776_x_221156_x_223217_s_231982_at | 216396_s_218714_at | 219197_s_at | 208779_x_231832_at | 212298_at | 212586_at | 223218_s_232055_at | 216855_s_219690_at | 219854_at | 201752_s_223776_x_200906_s_228298_at | 224832_at | 238127_at | 217875_s_219933_at | 221462_x_at | 210749_x_212298_at | 226599_at | 242546_at | 226628_at | 243201_at | 218218_at | 221156_x_221766_s_at | 219356_s_221511_x_204393_s_223467_at | 228634_s_244471_x_221808_at | 222156_x_223044_at | 228634_s_200906_s_224870_at | 1555867_a_231002_s_at | 222076_at | 225064_at | 224973_at | 218995_s_201616_s_217256_x_201617_x_231915_at | 222450_at | 228257_at | 226626_at | 201778_s_226599_at | 215198_s_231832_at | 243346_at | 223722_at | 228298_at | 228938_at | 216264_s_231915_at | 204393_s_231882_at | 223776_x_244721_at | 224090_s_229015_at | 230485_at | 217256_x_210508_s_224870_at | 223032_x_212298_at | 244808_at | 224535_s_230815_at | 233322_at | 218718_at | 201041_s_217256_x_200907_s_221511_x_at | 204011_at | 215198_s_201931_at | 200906_s_at | 227147_s_242307_at | 236324_at | 218765_at | 210510_s_212463_at | 214151_s_201616_s_at | 228328_at | 38037_at | 238063_at | 2226996_at | 231882_at | 56256_at | 200996_at | 228848_at | 38447_at | 240336_at | 222444_at | 1557535_a_223032_x_226304_at | 226599_at | 231881_at | 41644_at | 222719_s_212185_x_200907_s_228098_s_204393_s_at | 233267_at | 45687_at | 223001_at | 233317_at | 201931_at | 209492_x_224870_at | 233565_s_at | 223032_x_221269_s_56256_at | 235603_at | 230972_at | 234495_at | 223129_x_209281_s_226304_at | 235231_at | 217256_x_at | 237989_at | 223130_s_207335_x_228098_s_223129_x_215198_s_at | 239010_at | 223776_x_200863_s_209492_x_213062_at | 212463_at | 244245_at | 224232_s_201406_at | 235603_at | 214614_at | 231882_at | 224807_at | 235231_at | 218765_at | 223032_x_at | 224870_at | 225128_at | 223129_x_220052_s_200907_s_at | 224809_x_213062_at | 201951_at | 201931_at | 226599_at | 212586_at | 214614_at | 207761_s_201564_s_at | 226996_at |

242546\_at 218765\_at 201615\_x\_214151\_s\_at  
223467\_at 220052\_s\_213061\_s\_56256\_at  
201617\_x\_201951\_at 211747\_s\_226304\_at  
223776\_x\_207761\_s\_222719\_s\_228098\_s\_at  
200906\_s\_201615\_x\_204949\_at 209492\_x\_at  
201616\_s\_213061\_s\_200897\_s\_235603\_at  
226599\_at 211747\_s\_223001\_at 235231\_at  
204393\_s\_222719\_s\_227812\_at 223129\_x\_at  
224870\_at 223199\_at 217774\_s\_213062\_at  
230972\_at 214076\_at 200864\_s\_214614\_at  
217256\_x\_204949\_at 209019\_s\_218765\_at  
215198\_s\_200897\_s\_222444\_at 220052\_s\_at  
212463\_at 223001\_at 201581\_at 201951\_at  
231882\_at 201005\_at 218718\_at 207761\_s\_at  
223032\_x\_227812\_at 201023\_at 201615\_x\_at  
200907\_s\_209935\_at 1563505\_a213061\_s\_at  
201931\_at 228748\_at 212930\_at 1552430\_at  
56256\_at 205525\_at 234072\_at 211747\_s\_at  
228098\_s\_211559\_s\_224232\_s\_212143\_s\_at  
209492\_x\_200864\_s\_214880\_x\_222719\_s\_at  
235603\_at 222444\_at 205031\_at 223199\_at  
235231\_at 201581\_at 220319\_s\_214076\_at  
223129\_x\_218113\_at 225395\_s\_222156\_x\_at  
213062\_at 218718\_at 223130\_s\_204949\_at  
214614\_at 201023\_at 227291\_s\_200897\_s\_at  
218765\_at 212930\_at 1569847\_a200026\_at  
220052\_s\_224232\_s\_205133\_s\_223001\_at  
201951\_at 214767\_s\_218376\_s\_201005\_at  
207761\_s\_205031\_at 203265\_s\_204622\_x\_at  
213061\_s\_230069\_at 205569\_at 227812\_at  
1552430\_a207222\_at 210592\_s\_213101\_s\_at  
211747\_s\_225395\_s\_216264\_s\_217774\_s\_at  
212143\_s\_223130\_s\_227279\_at 216248\_s\_at  
222719\_s\_227291\_s\_221558\_s\_209935\_at  
214076\_at 205133\_s\_204389\_at 228748\_at  
204949\_at 218376\_s\_201952\_at 205525\_at  
200897\_s\_235834\_at 1561365\_a211559\_s\_at  
200026\_at 205184\_at 215716\_s\_200864\_s\_at  
223001\_at 203265\_s\_200976\_s\_209019\_s\_at  
201005\_at 205569\_at 204388\_s\_222444\_at  
227812\_at 200984\_s\_243084\_at 201581\_at  
228748\_at 225407\_at 1555351\_s218113\_at  
205525\_at 212077\_at 201776\_s\_218718\_at  
200864\_s\_216264\_s\_201830\_s\_201023\_at  
209019\_s\_225912\_at 202770\_s\_1563505\_at  
222444\_at 227279\_at 218774\_at 230815\_at  
201581\_at 211423\_s\_1554339\_a212930\_at  
218113\_at 204389\_at 231881\_at 204347\_at  
218718\_at 201952\_at 218218\_at 234072\_at  
1563505\_a1561365\_a221478\_at 204621\_s\_at

ACCEPTED MANUSCRIPT

224232\_s\_215716\_s\_1554757\_a210933\_s\_at  
214767\_s\_200710\_at 200942\_s\_224232\_s\_at  
205031\_at 209043\_at 202166\_s\_214880\_x\_at  
230069\_at 200977\_s\_202769\_at 214767\_s\_at  
207222\_at 200976\_s\_203223\_at 205031\_at  
220319\_s\_204388\_s\_217875\_s\_230069\_at  
223130\_s\_203277\_at 233565\_s\_207222\_at  
227291\_s\_201401\_s\_216280\_s\_220319\_s\_at  
222122\_s\_200985\_s\_226578\_s\_218714\_at  
1569847\_a1555351\_s200983\_x\_205814\_at  
221028\_s\_201776\_s\_216396\_s\_225395\_s\_at  
205133\_s\_202770\_s\_210472\_at 203821\_at  
235834\_at 235311\_at 208719\_s\_223130\_s\_at  
205569\_at 221479\_s\_213988\_s\_1559023\_a\_at  
200984\_s\_218205\_s\_1564010\_a227291\_s\_at  
225407\_at 202336\_s\_237989\_at 222122\_s\_at  
212077\_at 210136\_at 211509\_s\_1569847\_at  
216264\_s\_243201\_at 204708\_at 229015\_at  
225912\_at 221478\_at 216855\_s\_1554685\_a\_at  
227279\_at 224973\_at 208289\_s\_45687\_at  
224336\_s\_201032\_at 201276\_at 221028\_s\_at  
211423\_s\_208151\_x\_233267\_at 205133\_s\_at  
201829\_at 202769\_at 226895\_at 218376\_s\_at  
209043\_at 214620\_x\_223722\_at 235834\_at  
1554544\_a223044\_at 205302\_at 205184\_at  
200985\_s\_218729\_at 228848\_at 203265\_s\_at  
201830\_s\_233322\_at 200973\_s\_205569\_at  
202770\_s\_201580\_s\_204386\_s\_242307\_at  
210095\_s\_201777\_s\_227147\_s\_38447\_at  
218205\_s\_200983\_x\_227787\_s\_210592\_s\_at  
202336\_s\_208719\_s\_203266\_s\_200984\_s\_at  
224973\_at 203060\_s\_234966\_at 225407\_at  
201032\_at 218085\_at 204983\_s\_38037\_at  
200942\_s\_211509\_s\_239010\_at 212077\_at  
202769\_at 204708\_at 203986\_at 213236\_at  
203223\_at 203441\_s\_1569194\_a208718\_at  
223044\_at 236324\_at 213998\_s\_216264\_s\_at  
218729\_at 1555350\_a244245\_at 225912\_at  
233322\_at 202100\_at 214629\_x\_227279\_at  
200983\_x\_212958\_x\_222450\_at 200594\_x\_at  
1564010\_a226895\_at 218439\_s\_219933\_at  
218085\_at 226022\_at 224090\_s\_224336\_s\_at  
211509\_s\_231301\_at 209703\_x\_211423\_s\_at  
236324\_at 227787\_s\_228097\_at 201829\_at  
1555350\_a219390\_at 213319\_s\_221558\_s\_at  
202100\_at 207602\_at 202904\_s\_204389\_at  
204386\_s\_234966\_at 216281\_at 205107\_s\_at  
227787\_s\_203986\_at 207357\_s\_201952\_at  
207602\_at 226626\_at 221808\_at 1561365\_at  
226626\_at 201753\_s\_207323\_s\_215716\_s\_at



201753\_s\_209112\_at 230906\_at 200710\_at  
1569194\_a 1553323\_a 1563112\_a 209043\_at  
209112\_at 213998\_s\_203006\_at 1555765\_a\_at  
201034\_at 201034\_at 234495\_at 41644\_at  
219854\_at 219854\_at 211486\_s\_200977\_s\_at  
210883\_x\_238127\_at 202101\_s\_1554544\_a\_at  
214629\_x\_210883\_x\_203440\_at 203058\_s\_at  
218439\_s\_209892\_at 228328\_at 200976\_s\_at  
202071\_at 214629\_x\_213544\_at 204388\_s\_at  
228938\_at 1555399\_a 204984\_at 219690\_at  
238063\_at 229524\_at 224535\_s\_225064\_at  
228097\_at 212741\_at 201160\_s\_203277\_at  
209917\_s\_218439\_s\_222076\_at 201401\_s\_at  
221766\_s\_202071\_at 243084\_at  
209263\_x\_228938\_at 201044\_x\_at  
212994\_at 200593\_s\_at 200985\_s\_at  
218421\_at 238063\_at 1555351\_s\_at  
207357\_s\_244471\_x\_at 232770\_at  
207323\_s\_228097\_at 228257\_at  
210241\_s\_209917\_s\_at 201776\_s\_at  
230906\_at 221766\_s\_at 201830\_s\_at  
203006\_at 209263\_x\_at 215064\_at  
209072\_at 212994\_at 202770\_s\_at  
240336\_at 221350\_at 235311\_at  
230485\_at 218421\_at 209227\_at  
233477\_at 227153\_at 221479\_s\_at  
202165\_at 203304\_at 210095\_s\_at  
221462\_x\_207323\_s\_at 218774\_at  
219197\_s\_210241\_s\_at  
210968\_s\_230906\_at  
210886\_x\_231982\_at  
208482\_at  
202101\_s\_at  
209072\_at  
240336\_at  
230485\_at  
233477\_at  
232055\_at  
202165\_at  
228081\_at  
221462\_x\_at  
219197\_s\_at  
210968\_s\_at  
210886\_x\_at

et  
it  
at  
at  
at  
at  
at

at

at

at

at  
at  
at  
at  
at  
at  
at

at

at  
at  
at

at  
at

at

at  
at  
at  
at  
at

ACCEPTED MANUSCRIPT

| Probeset ID | r        | p-value  | (cor) | Gene Sym | Gene Title   | RefSeq       | Transcript ID                                       |
|-------------|----------|----------|-------|----------|--------------|--------------|-----------------------------------------------------|
| 210095_s_   | 0.735032 | 9.58E-13 |       | IGFBP3   | insulin-like | NM_000598    | /// NM_001013398                                    |
| 210510_s_   | 0.712515 | 9.46E-12 |       | NRP1     | neuropilin   | NM_001024628 | /// NM_001024629 /// NM_003873                      |
| 212298_at   | 0.647209 | 2.46E-09 |       | NRP1     | neuropilin   | NM_001024628 | /// NM_001024629 /// NM_003873                      |
| 212143_s_   | 0.63848  | 4.69E-09 |       | IGFBP3   | insulin-like | NM_000598    | /// NM_001013398                                    |
| 217774_s_   | 0.59159  | 1.08E-07 |       | TRMT112  | tRNA meth    | NM_016404    |                                                     |
| 227962_at   | -0.58743 | 1.39E-07 |       | ACOX1    | acyl-Coenz   | NM_004035    | /// NM_007292                                       |
| 202071_at   | 0.57197  | 3.48E-07 |       | SDC4     | syndecan     | NM_002999    |                                                     |
| 200977_s_   | 0.560916 | 6.52E-07 |       | TAX1BP1  | Tax1 (hum    | NM_001079864 | /// NM_006024                                       |
| 223467_at   | -0.54723 | 1.37E-06 |       | RASD1    | RAS, dexa    | NM_016084    |                                                     |
| 235591_at   | 0.546435 | 1.43E-06 |       | SSTR1    | somatostat   | NM_001049    |                                                     |
| 230485_at   | -0.51399 | 7.36E-06 |       | LOC64484 | hypothetic   | NM_001145643 |                                                     |
| 210933_s_   | 0.509907 | 8.93E-06 |       | FSCN1    | fascin hom   | NM_003088    |                                                     |
| 201023_at   | 0.501177 | 1.34E-05 |       | TAF7     | TAF7 RNA     | NM_005642    |                                                     |
| 205569_at   | 0.49149  | 2.08E-05 |       | LAMP3    | lysosomal    | NM_014398    |                                                     |
| 228298_at   | 0.48225  | 3.12E-05 |       | FAM113B  | family with  | NM_138371    |                                                     |
| 201034_at   | 0.479803 | 3.47E-05 |       | ADD3     | adducin 3    | (NM_001121   | /// NM_016824 /// NM_019903                         |
| 214152_at   | -0.47836 | 3.69E-05 |       | CCPG1    | cell cycle p | NM_004748    | /// NM_020739                                       |
| 200985_s_   | 0.473419 | 4.56E-05 |       | CD59     | CD59 mole    | NM_000611    | /// NM_001127223 /// NM_001127225 /// NM_00112722   |
| 203303_at   | 0.469932 | 5.27E-05 |       | DYNLT3   | dynein, lig  | NM_006520    |                                                     |
| 219197_s_   | 0.46781  | 5.76E-05 |       | SCUBE2   | signal pept  | NM_020974    |                                                     |
| 204011_at   | -0.46746 | 5.84E-05 |       | SPRY2    | sprouty hor  | NM_005842    |                                                     |
| 210592_s_   | 0.461345 | 7.51E-05 |       | SAT1     | spermidine   | NM_002970    | /// NR_027783                                       |
| 210968_s_   | 0.461121 | 7.58E-05 |       | RTN4     | reticulon 4  | NM_007008    | /// NM_020532 /// NM_153828 /// NM_207520 /// NM_20 |
| 222802_at   | 0.459428 | 8.11E-05 |       | EDN1     | endothelin   | NM_001955    |                                                     |
| 231915_at   | -0.45135 | 0.000112 |       | ZSWIM4   | zinc finger, | NM_023072    |                                                     |
| 214151_s_   | -0.44866 | 0.000124 |       | CCPG1    | cell cycle p | NM_004748    | /// NM_020739                                       |
| 216855_s_   | -0.44835 | 0.000126 |       | HNRNP1   | heterogene   | NM_004501    | /// NM_031844                                       |
| 1554868_s   | 0.436748 | 0.000196 |       | PCNP     | PEST prote   | NM_020357    |                                                     |
| 201032_at   | 0.434525 | 0.000213 |       | BLCAP    | bladder car  | NM_006698    |                                                     |
| 233565_s_   | 0.43063  | 0.000247 |       | SDCBP2   | syndecan t   | NM_015685    | /// NM_080489                                       |
| 226304_at   | -0.42855 | 0.000266 |       | HSPB6    | heat shock   | NM_144617    |                                                     |
| 201753_s_   | 0.422573 | 0.000331 |       | ADD3     | adducin 3    | (NM_001121   | /// NM_016824 /// NM_019903                         |
| 218995_s_   | 0.420024 | 0.000363 |       | EDN1     | endothelin   | NM_001955    |                                                     |
| 238063_at   | 0.419351 | 0.000372 |       | TMEM154  | transmemt    | NM_152680    |                                                     |
| 212942_s_   | 0.416965 | 0.000404 |       | KIAA1199 | KIAA1199     | NM_018689    |                                                     |
| 221462_x_   | -0.41477 | 0.000437 |       | KLK15    | kallikrein-r | NM_017509    | /// NM_138563 /// NM_138564                         |
| 203986_at   | 0.412478 | 0.000473 |       | STBD1    | starch bind  | NM_003943    |                                                     |
| 201776_s_   | 0.403422 | 0.000647 |       | KIAA0494 | KIAA0494     | NM_014774    |                                                     |
| 226996_at   | 0.403279 | 0.00065  |       | LCLAT1   | lysocardioli | NM_001002257 | /// NM_182551                                       |
| 200984_s_   | 0.398772 | 0.000756 |       | CD59     | CD59 mole    | NM_000611    | /// NM_001127223 /// NM_001127225 /// NM_00112722   |
| 200976_s_   | 0.398405 | 0.000766 |       | TAX1BP1  | Tax1 (hum    | NM_001079864 | /// NM_006024                                       |
| 236324_at   | -0.39822 | 0.00077  |       | MBP      | Myelin basi  | NM_001025081 | /// NM_001025090 /// NM_001025092 /// NM_00102      |
| 214629_x_   | 0.397752 | 0.000783 |       | RTN4     | reticulon 4  | NM_007008    | /// NM_020532 /// NM_153828 /// NM_207520 /// NM_20 |
| 203265_s_   | -0.39545 | 0.000845 |       | MAP2K4   | mitogen-ac   | NM_003010    |                                                     |
| 205882_x_   | 0.394061 | 0.000885 |       | ADD3     | adducin 3    | (NM_001121   | /// NM_016824 /// NM_019903                         |
| 211509_s_   | 0.39382  | 0.000892 |       | RTN4     | reticulon 4  | NM_007008    | /// NM_020532 /// NM_153828 /// NM_207520 /// NM_20 |
| 201752_s_   | 0.392918 | 0.000918 |       | ADD3     | adducin 3    | (NM_001121   | /// NM_016824 /// NM_019903                         |
| 211486_s_   | -0.39198 | 0.000947 |       | KCNQ2    | potassium    | NM_004518    | /// NM_172106 /// NM_172107 /// NM_172108 /// NM_17 |
| 1555867_a   | -0.39031 | 0.001    |       | GNG4     | guanine nu   | NM_001098721 | /// NM_001098722 /// NM_004485                      |
| 202166_s_   | 0.389879 | 0.001014 |       | PPP1R2   | protein phc  | NM_006241    |                                                     |
| 233477_at   | -0.38331 | 0.001253 |       | KLK15    | kallikrein-r | NM_017509    | /// NM_138563 /// NM_138564                         |
| 223218_s_   | 0.377703 | 0.001496 |       | NFKB1Z   | nuclear fac  | NM_001005474 | /// NM_031419                                       |
| 216280_s_   | -0.3765  | 0.001554 |       | DICER1   | dicer 1, rib | NM_030621    | /// NM_177438                                       |
| 201951_at   | 0.376133 | 0.001572 |       | ALCAM    | activated le | NM_001627    |                                                     |
| 223450_s_   | -0.3744  | 0.001659 |       | COG3     | component    | NM_031431    |                                                     |
| 217816_s_   | 0.372564 | 0.001756 |       | PCNP     | PEST prote   | NM_020357    |                                                     |
| 203440_at   | 0.371585 | 0.001809 |       | CDH2     | cadherin 2,  | NM_001792    |                                                     |
| 213319_s_   | -0.3704  | 0.001876 |       | CSDA     | Cold shock   | NM_001145426 | /// NM_003651                                       |
| 201952_at   | 0.369158 | 0.001949 |       | ALCAM    | activated le | NM_001627    |                                                     |
| 228634_s_   | -0.36708 | 0.002076 |       | CSDA     | Cold shock   | NM_001145426 | /// NM_003651                                       |
| 236492_at   | -0.36647 | 0.002115 |       | PPP2R2A  | protein phi  | NM_002717    |                                                     |

|           |          |          |          |              |                                                               |
|-----------|----------|----------|----------|--------------|---------------------------------------------------------------|
| 231832_at | -0.36592 | 0.00215  | GALNT4   | UDP-N-ac     | NM_003774                                                     |
| 221808_at | 0.365609 | 0.00217  | RAB9A    | RAB9A, m     | NM_004251                                                     |
| 209966_x_ | -0.36516 | 0.0022   | ESRRG    | estrogen-r   | NM_001134285 /// NM_001438 /// NM_206594 /// NM_206595 /// NR |
| 201615_x_ | -0.36383 | 0.002289 | CALD1    | caldesmon    | NM_004342 /// NM_033138 /// NM_033139 /// NM_033140 /// NM_03 |
| 201931_at | 0.36155  | 0.002451 | ETFA     | electron-tr  | NM_000126 /// NM_001127716                                    |
| 230815_at | -0.35943 | 0.00261  | LOC38976 | similar to K | XR_078414 /// XR_079065 /// XR_079253                         |
| 200594_x_ | 0.359361 | 0.002615 | HNRNPU   | heterogene   | NM_004501 /// NM_031844                                       |
| 228257_at | 0.358491 | 0.002684 | ANKRD52  | ankyrin rep  | NM_173595                                                     |
| 221156_x_ | -0.35409 | 0.003053 | CCPG1    | cell cycle p | NM_004748 /// NM_020739                                       |
| 215728_s_ | -0.35305 | 0.003147 | ACOT7    | acyl-CoA t   | NM_007274 /// NM_181864 /// NM_181865 /// NM_181866           |
| 209227_at | -0.34746 | 0.003695 | TUSC3    | tumor sup    | NM_006765 /// NM_178234                                       |
| 204745_x_ | -0.34509 | 0.003951 | MT1G     | metallothio  | NM_005950                                                     |
| 212994_at | -0.34342 | 0.004142 | THOC2    | THO comp     | NM_001081550 /// NM_020449                                    |
| 200983_x_ | 0.341971 | 0.004314 | CD59     | CD59 mole    | NM_000611 /// NM_001127223 /// NM_001127225 /// NM_00112722   |
| 224090_s_ | -0.33999 | 0.004558 | TNFRSF1  | tumor necr   | NM_018647 /// NM_148957                                       |
| 221511_x_ | -0.33628 | 0.005051 | CCPG1    | cell cycle p | NM_004748 /// NM_020739                                       |
| 228938_at | -0.33604 | 0.005085 | MBP      | Myelin basi  | NM_001025081 /// NM_001025090 /// NM_001025092 /// NM_00102   |
| 203725_at | 0.334261 | 0.005338 | GADD45A  | growth arre  | NM_001924                                                     |
| 213988_s_ | 0.333364 | 0.00547  | SAT1     | spermidine   | NM_002970 /// NR_027783                                       |
| 226599_at | 0.331916 | 0.005689 | FHDC1    | FH2 domai    | NM_033393                                                     |
| 206461_x_ | -0.33045 | 0.00592  | MT1H     | metallothio  | NM_005951                                                     |
| 234072_at | -0.3289  | 0.006172 | SEMA4A   | sema dom     | NM_022367                                                     |
| 212859_x_ | -0.3288  | 0.006189 | MT1E     | metallothio  | NM_175617                                                     |
| 224232_s_ | 0.326858 | 0.006518 | PRELID1  | PRELI dor    | NM_013237                                                     |
| 201132_at | 0.326246 | 0.006625 | HNRNPH2  | heterogene   | NM_001032393 /// NM_019597                                    |
| 207323_s_ | -0.3258  | 0.006704 | MBP      | myelin basi  | NM_001025081 /// NM_001025090 /// NM_001025092 /// NM_00102   |
| 200972_at | 0.325715 | 0.006719 | TSPAN3   | tetraspanin  | NM_005724 /// NM_198902                                       |
| 226442_at | -0.32457 | 0.006925 | ABTB1    | ankyrin rep  | NM_032548 /// NM_172027 /// NM_172028                         |
| 205184_at | -0.32345 | 0.007134 | GNG4     | guanine nu   | NM_001098721 /// NM_001098722 /// NM_004485                   |
| 1561365_a | 0.323329 | 0.007157 | NRP1     | Neuropilin   | NM_001024628 /// NM_001024629 /// NM_003873                   |
| 204347_at | -0.31974 | 0.007862 | AK3L1    | adenylate    | NM_001005353 /// NM_013410 /// NM_203464                      |
| 1554757_a | -0.31717 | 0.008404 | INPP5A   | inositol pol | NM_005539                                                     |
| 201778_s_ | 0.316558 | 0.008538 | KIAA0494 | KIAA0494     | NM_014774                                                     |
| 237989_at | -0.31648 | 0.008556 | IGFBP1   | Insulin-like | NM_000596                                                     |
| 1554448_a | -0.3117  | 0.009667 | LOC55420 | alanyl-tRN   | NR_024582                                                     |
| 220374_at | -0.30905 | 0.010336 | KLHL28   | kelch-like 2 | NM_017658                                                     |
| 226628_at | -0.30782 | 0.010661 | THOC2    | THO comp     | NM_001081550 /// NM_020449                                    |
| 205737_at | -0.30716 | 0.01084  | KCNQ2    | potassium    | NM_004518 /// NM_172106 /// NM_172107 /// NM_172108 /// NM_17 |
| 225395_s_ | 0.300547 | 0.012764 | FAM120AC | family with  | NM_198841                                                     |
| 203455_s_ | 0.299571 | 0.013072 | SAT1     | spermidine   | NM_002970 /// NR_027783                                       |
| 204348_s_ | -0.29896 | 0.013269 | AK3L1    | adenylate    | NM_001005353 /// NM_013410 /// NM_203464                      |
| 225342_at | -0.29822 | 0.013508 | AK3L1    | adenylate    | NM_001005353 /// NM_013410 /// NM_203464                      |
| 215198_s_ | -0.298   | 0.013581 | CALD1    | caldesmon    | NM_004342 /// NM_033138 /// NM_033139 /// NM_033140 /// NM_03 |
| 201564_s_ | 0.296958 | 0.013928 | FSCN1    | fascin hom   | NM_003088                                                     |
| 225092_at | -0.29688 | 0.013955 | RABEP1   | rabaptin, R  | NM_001083585 /// NM_004703                                    |
| 218256_s_ | 0.295163 | 0.014543 | NUP54    | nucleoporin  | NM_017426                                                     |
| 234459_at | -0.29433 | 0.014838 | PPHLN1   | periphilin 1 | NM_001143787 /// NM_001143788 /// NM_001143789 /// NM_01648   |
| 244819_x_ | -0.29259 | 0.015465 | PSPH     | phosphose    | NM_004577                                                     |
| 218218_at | 0.291981 | 0.015692 | APPL2    | adaptor pr   | NM_018171                                                     |
| 221269_s_ | 0.290411 | 0.016287 | SH3BGR1  | SH3 domai    | NM_031286                                                     |
| 214076_at | -0.28845 | 0.017056 | GFOD2    | glucose-fru  | NM_030819 /// NR_027398 /// NR_027399                         |
| 1007_s_at | 0.288432 | 0.017065 | DDR1     | discoidin d  | NM_001954 /// NM_013993 /// NM_013994                         |
| 234495_at | -0.28784 | 0.017303 | KLK15    | kallikrein-r | NM_017509 /// NM_138563 /// NM_138564                         |
| 41644_at  | -0.2878  | 0.01732  | SASH1    | SAM and S    | NM_015278                                                     |
| 1555765_a | -0.28684 | 0.017713 | GNG4     | guanine nu   | NM_001098721 /// NM_001098722 /// NM_004485                   |
| 204389_at | 0.286311 | 0.017933 | MAOA     | monoamin     | NM_000240                                                     |
| 238440_at | -0.28558 | 0.018243 | CLYBL    | citrate lyas | NM_206808                                                     |
| 209043_at | -0.28321 | 0.019271 | PAPSS1   | 3'-phospho   | NM_005443                                                     |
| 204388_s_ | 0.28315  | 0.019298 | MAOA     | monoamin     | NM_000240                                                     |
| 221766_s_ | 0.282783 | 0.019462 | FAM46A   | family with  | NM_017633                                                     |
| 223518_at | 0.281947 | 0.01984  | DFFA     | DNA fragm    | NM_004401 /// NM_213566                                       |
| 219356_s_ | 0.281906 | 0.019859 | CHMP5    | chromatin    | NM_016410                                                     |

Supplementary Table S7 Clinical characteristics for patients which follow-up is available

|                                   | No PSA Fail (n=41) | PSA Fail (n=15) | Total (n=56) | p value  |
|-----------------------------------|--------------------|-----------------|--------------|----------|
| <b>Age</b>                        |                    |                 |              | 0.6701   |
| Mean (SD)                         | 61.8 (7.56)        | 60.5 (8.05)     | 61.4 (7.64)  |          |
| Median                            | 62.0               | 62.0            | 62.0         |          |
| Q1, Q3                            | 57.0, 68.0         | 50.0, 68.0      | 56.5, 68.0   |          |
| Range                             | 47.0-74.0          | 48.0-71.0       | 47.0-74.0    |          |
| <b>Fail or follow-up (months)</b> |                    |                 |              | < 0.0001 |
| Mean (SD)                         | 51.6 (17.49)       | 17.6 (13.88)    | 42.5 (22.42) |          |
| Median                            | 49.1               | 14.1            | 45.2         |          |
| Q1, Q3                            | 43.6, 61.6         | 5.9, 23.0       | 25.5, 55.7   |          |
| Range                             | 0.6-91.5           | 3.6-45.8        | 0.6-91.5     |          |
| <b>Gleason score</b>              |                    |                 |              | 0.0710   |
| 6                                 | 20 (48.8%)         | 4 (26.7%)       | 24 (42.9%)   |          |
| 7                                 | 14 (34.1%)         | 4 (26.7%)       | 18 (32.1%)   |          |
| 8-10                              | 7 (17.1%)          | 7 (46.7%)       | 14 (25%)     |          |
| <b>Gleason Pattern</b>            |                    |                 |              | 0.0353   |
| GP3                               | 25 (61%)           | 4 (26.7%)       | 29 (51.8%)   |          |
| GP4                               | 12 (29.3%)         | 6 (40%)         | 18 (32.1%)   |          |
| GP5                               | 4 (9.8%)           | 5 (33.3%)       | 9 (16.1%)    |          |
| <b>Stage (pTNM)</b>               |                    |                 |              | 0.0636   |
| T2                                | 30 (73.2%)         | 7 (46.7%)       | 37 (66.1%)   |          |
| T3                                | 11 (26.8%)         | 8 (53.3%)       | 19 (33.9%)   |          |

| Probe Set | HRatio(ger | LowCI(gen | UpCI(gene | p-value(ge | Symbol   |
|-----------|------------|-----------|-----------|------------|----------|
| 209966_x_ | 0.485719   | 0.319565  | 0.738263  | 0.000723   | ESRRG    |
| 210136_at | 0.547273   | 0.373804  | 0.801241  | 0.00194    | MBP      |
| 235591_at | 1.41324    | 1.11931   | 1.78437   | 0.003644   | SSTR1    |
| 227962_at | 0.254348   | 0.094822  | 0.682259  | 0.006538   | ACOX1    |
| 238063_at | 2.203      | 1.23038   | 3.94445   | 0.007869   | TMEM154  |
| 201830_s_ | 4.82693    | 1.45045   | 16.0635   | 0.010282   | NET1     |
| 225407_at | 0.364757   | 0.167045  | 0.796478  | 0.011371   | MBP      |
| 217816_s_ | 30.4823    | 2.10568   | 441.269   | 0.012207   | PCNP     |
| 1564010_a | 10.6992    | 1.65287   | 69.2566   | 0.01287    | CAST     |
| 203266_s_ | 0.265341   | 0.091261  | 0.771483  | 0.014833   | MAP2K4   |
| 210095_s_ | 1.60194    | 1.09171   | 2.35063   | 0.016019   | IGFBP3   |
| 227787_s_ | 2.49346    | 1.17427   | 5.29466   | 0.017401   | MED30    |
| 202669_s_ | 0.687256   | 0.500259  | 0.944153  | 0.020631   | EFNB2    |
| 219197_s_ | 1.23648    | 1.03185   | 1.48168   | 0.021463   | SCUBE2   |
| 201581_at | 0.151552   | 0.029352  | 0.782498  | 0.024269   | TMX4     |
| 213786_at | 4.54925    | 1.1808    | 17.5268   | 0.0277     | TAX1BP1  |
| 209043_at | 0.265622   | 0.081281  | 0.868034  | 0.028218   | PAPSS1   |
| 213102_at | 5.01589    | 1.18734   | 21.1896   | 0.028266   | ACTR3    |
| 1554685_a | 0.001775   | 5.97E-06  | 0.527409  | 0.029242   | KIAA1199 |
| 207981_s_ | 0.623612   | 0.407665  | 0.953951  | 0.029453   | ESRRG    |
| 207323_s_ | 0.074424   | 0.007144  | 0.775285  | 0.02979    | MBP      |
| 225092_at | 0.370252   | 0.149991  | 0.913965  | 0.031151   | RABEP1   |
| 203455_s_ | 22.7502    | 1.29699   | 399.056   | 0.032522   | SAT1     |
| 210091_s_ | 0.064413   | 0.005174  | 0.801939  | 0.033043   | DTNA     |
| 219690_at | 0.349506   | 0.132852  | 0.919479  | 0.033163   | TMEM149  |
| 215716_s_ | 2.44695    | 1.06235   | 5.63616   | 0.035546   | ATP2B1   |
| 1566513_a | 0.00255    | 9.28E-06  | 0.700641  | 0.037145   | GNG4     |
| 223518_at | 3.25123    | 1.0589    | 9.9825    | 0.039399   | DFFA     |
| 227786_at | 2.82925    | 1.04167   | 7.68445   | 0.041342   | MED30    |
| 208289_s_ | 10.8024    | 1.07809   | 108.238   | 0.042976   | EI24     |
| 213988_s_ | 2.71771    | 1.02911   | 7.17701   | 0.0436     | SAT1     |
| 207357_s_ | 0.447834   | 0.202306  | 0.991345  | 0.047542   | GALNT10  |
| 210510_s_ | 1.32176    | 1.00291   | 1.74196   | 0.047629   | NRP1     |
| 209264_s_ | 15.8926    | 1.01819   | 248.063   | 0.048512   | TSPAN4   |

A

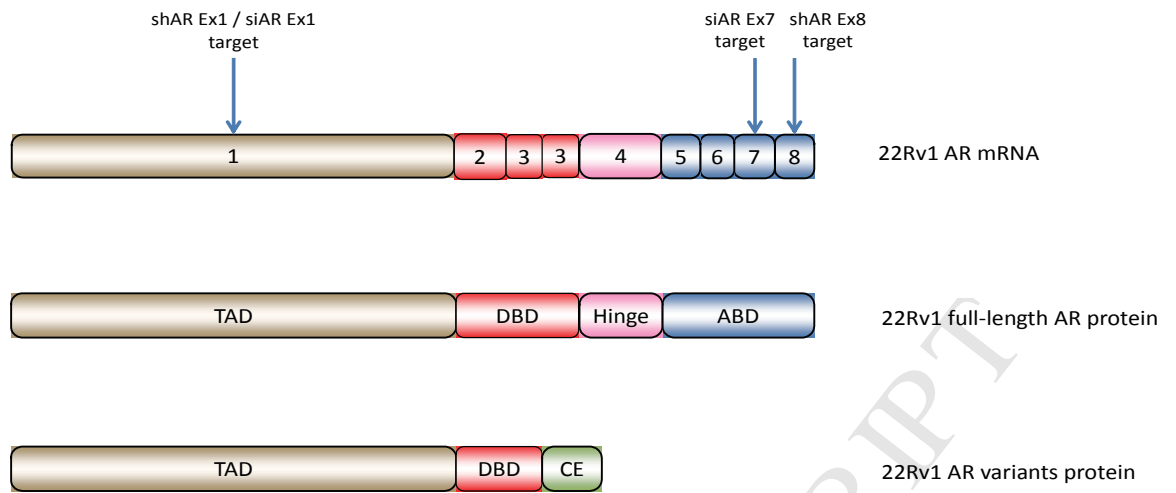

B

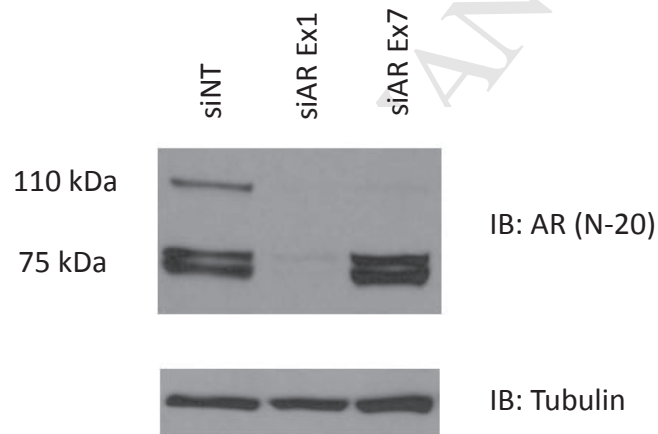

C

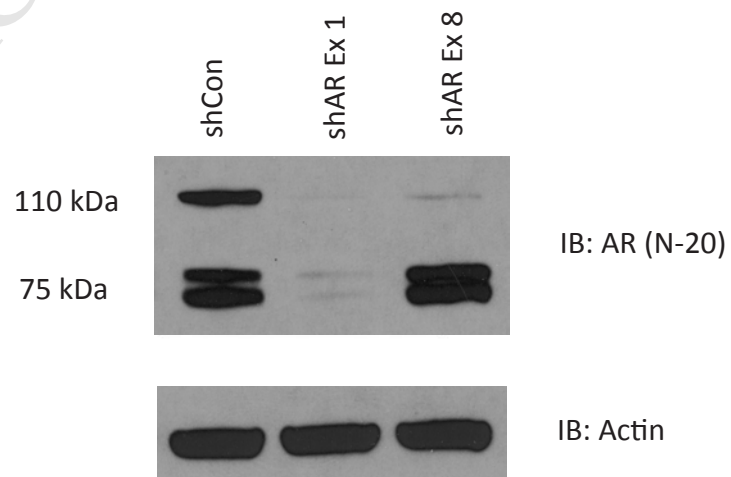

**A**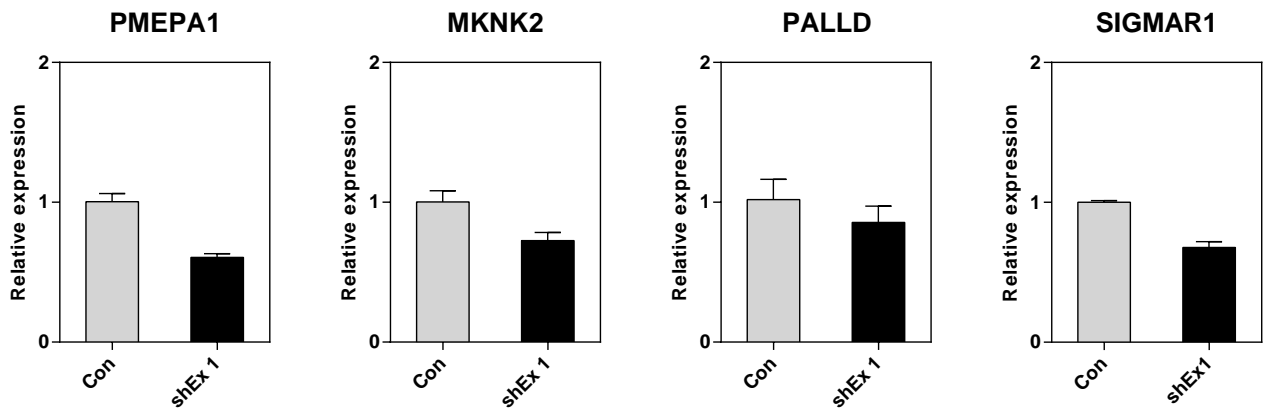**B**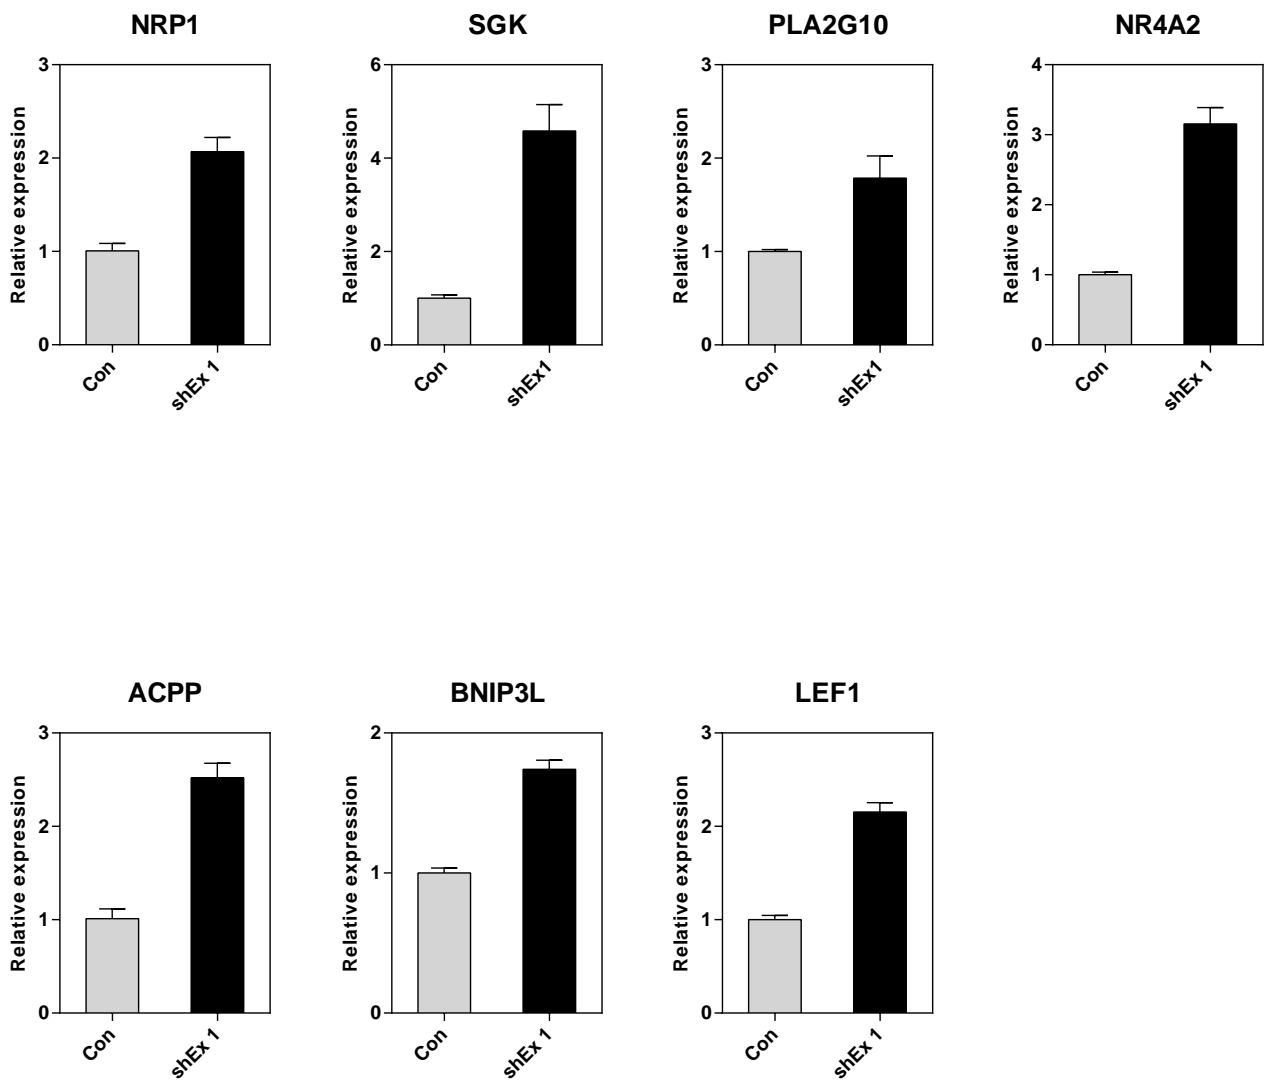

Supplement: NIHMS683024-supplement-01.pdf [file NIHMS683024-supplement-01.pdf]
